# Supplementary figures and images for: Predicting spinel solid solutions using a random atom substitution method
Source: Royal Society of Chemistry journal article supplement (doi:10.1039/d2cp02180c), 2022-01-01

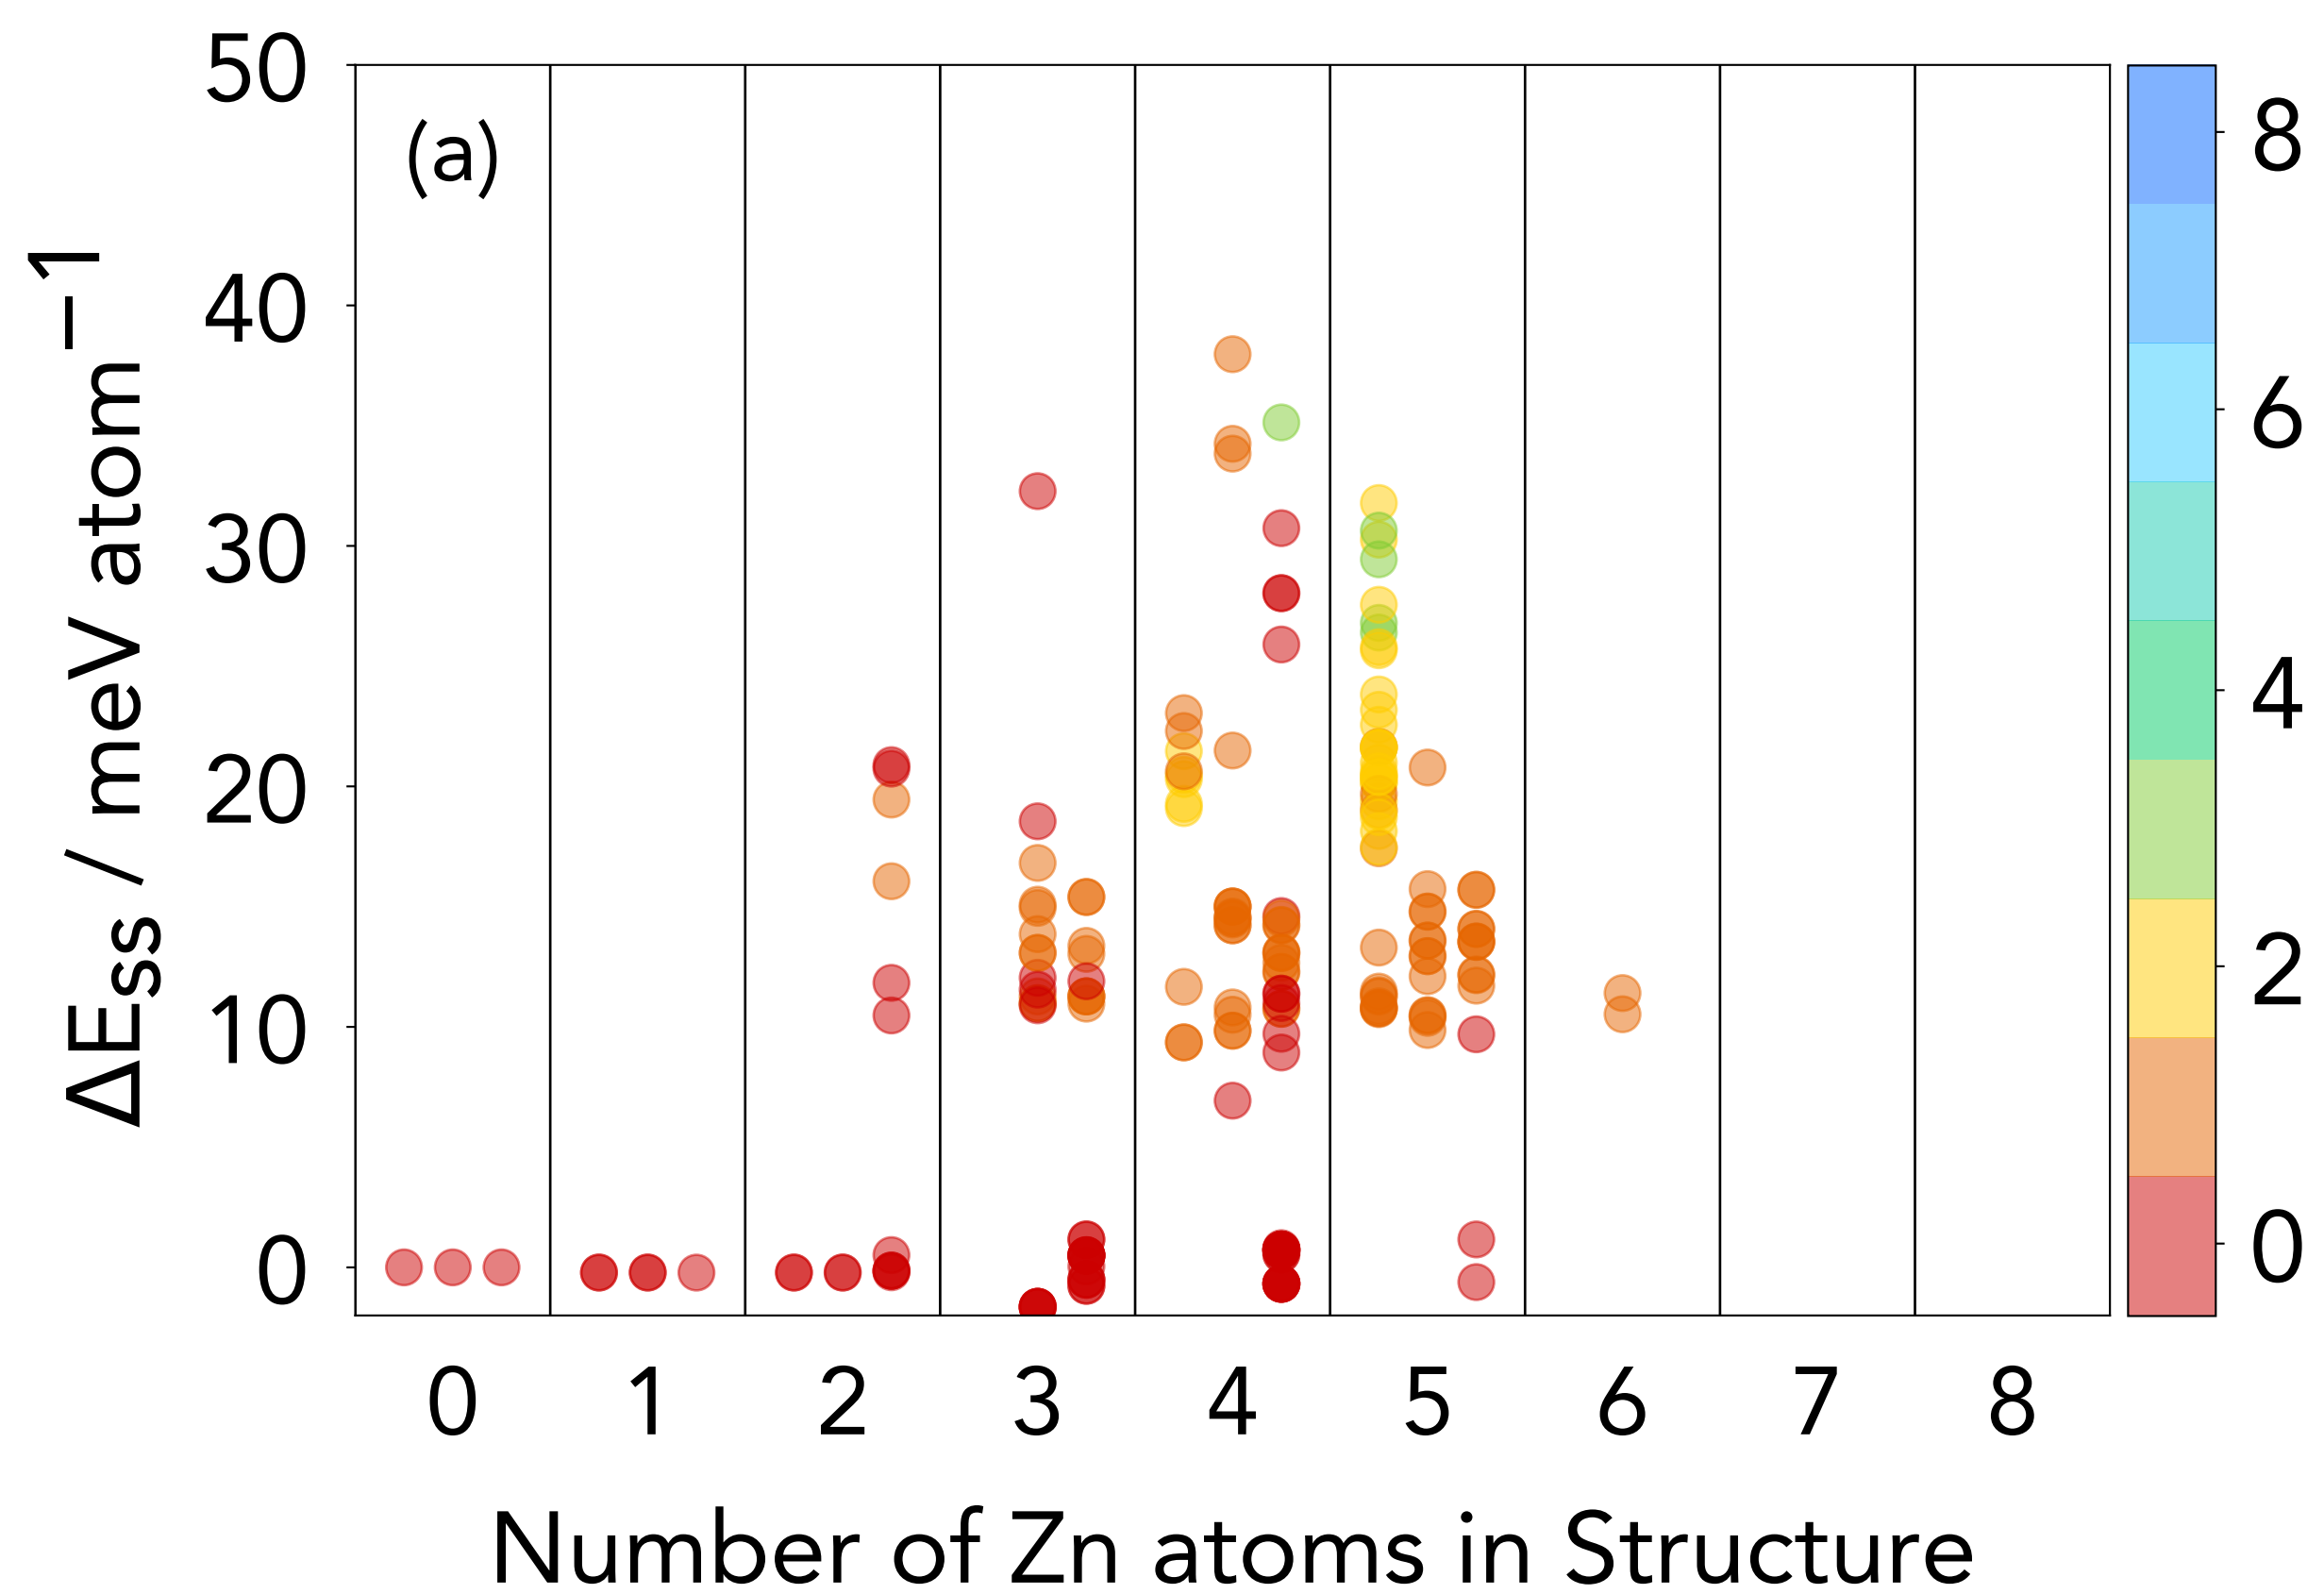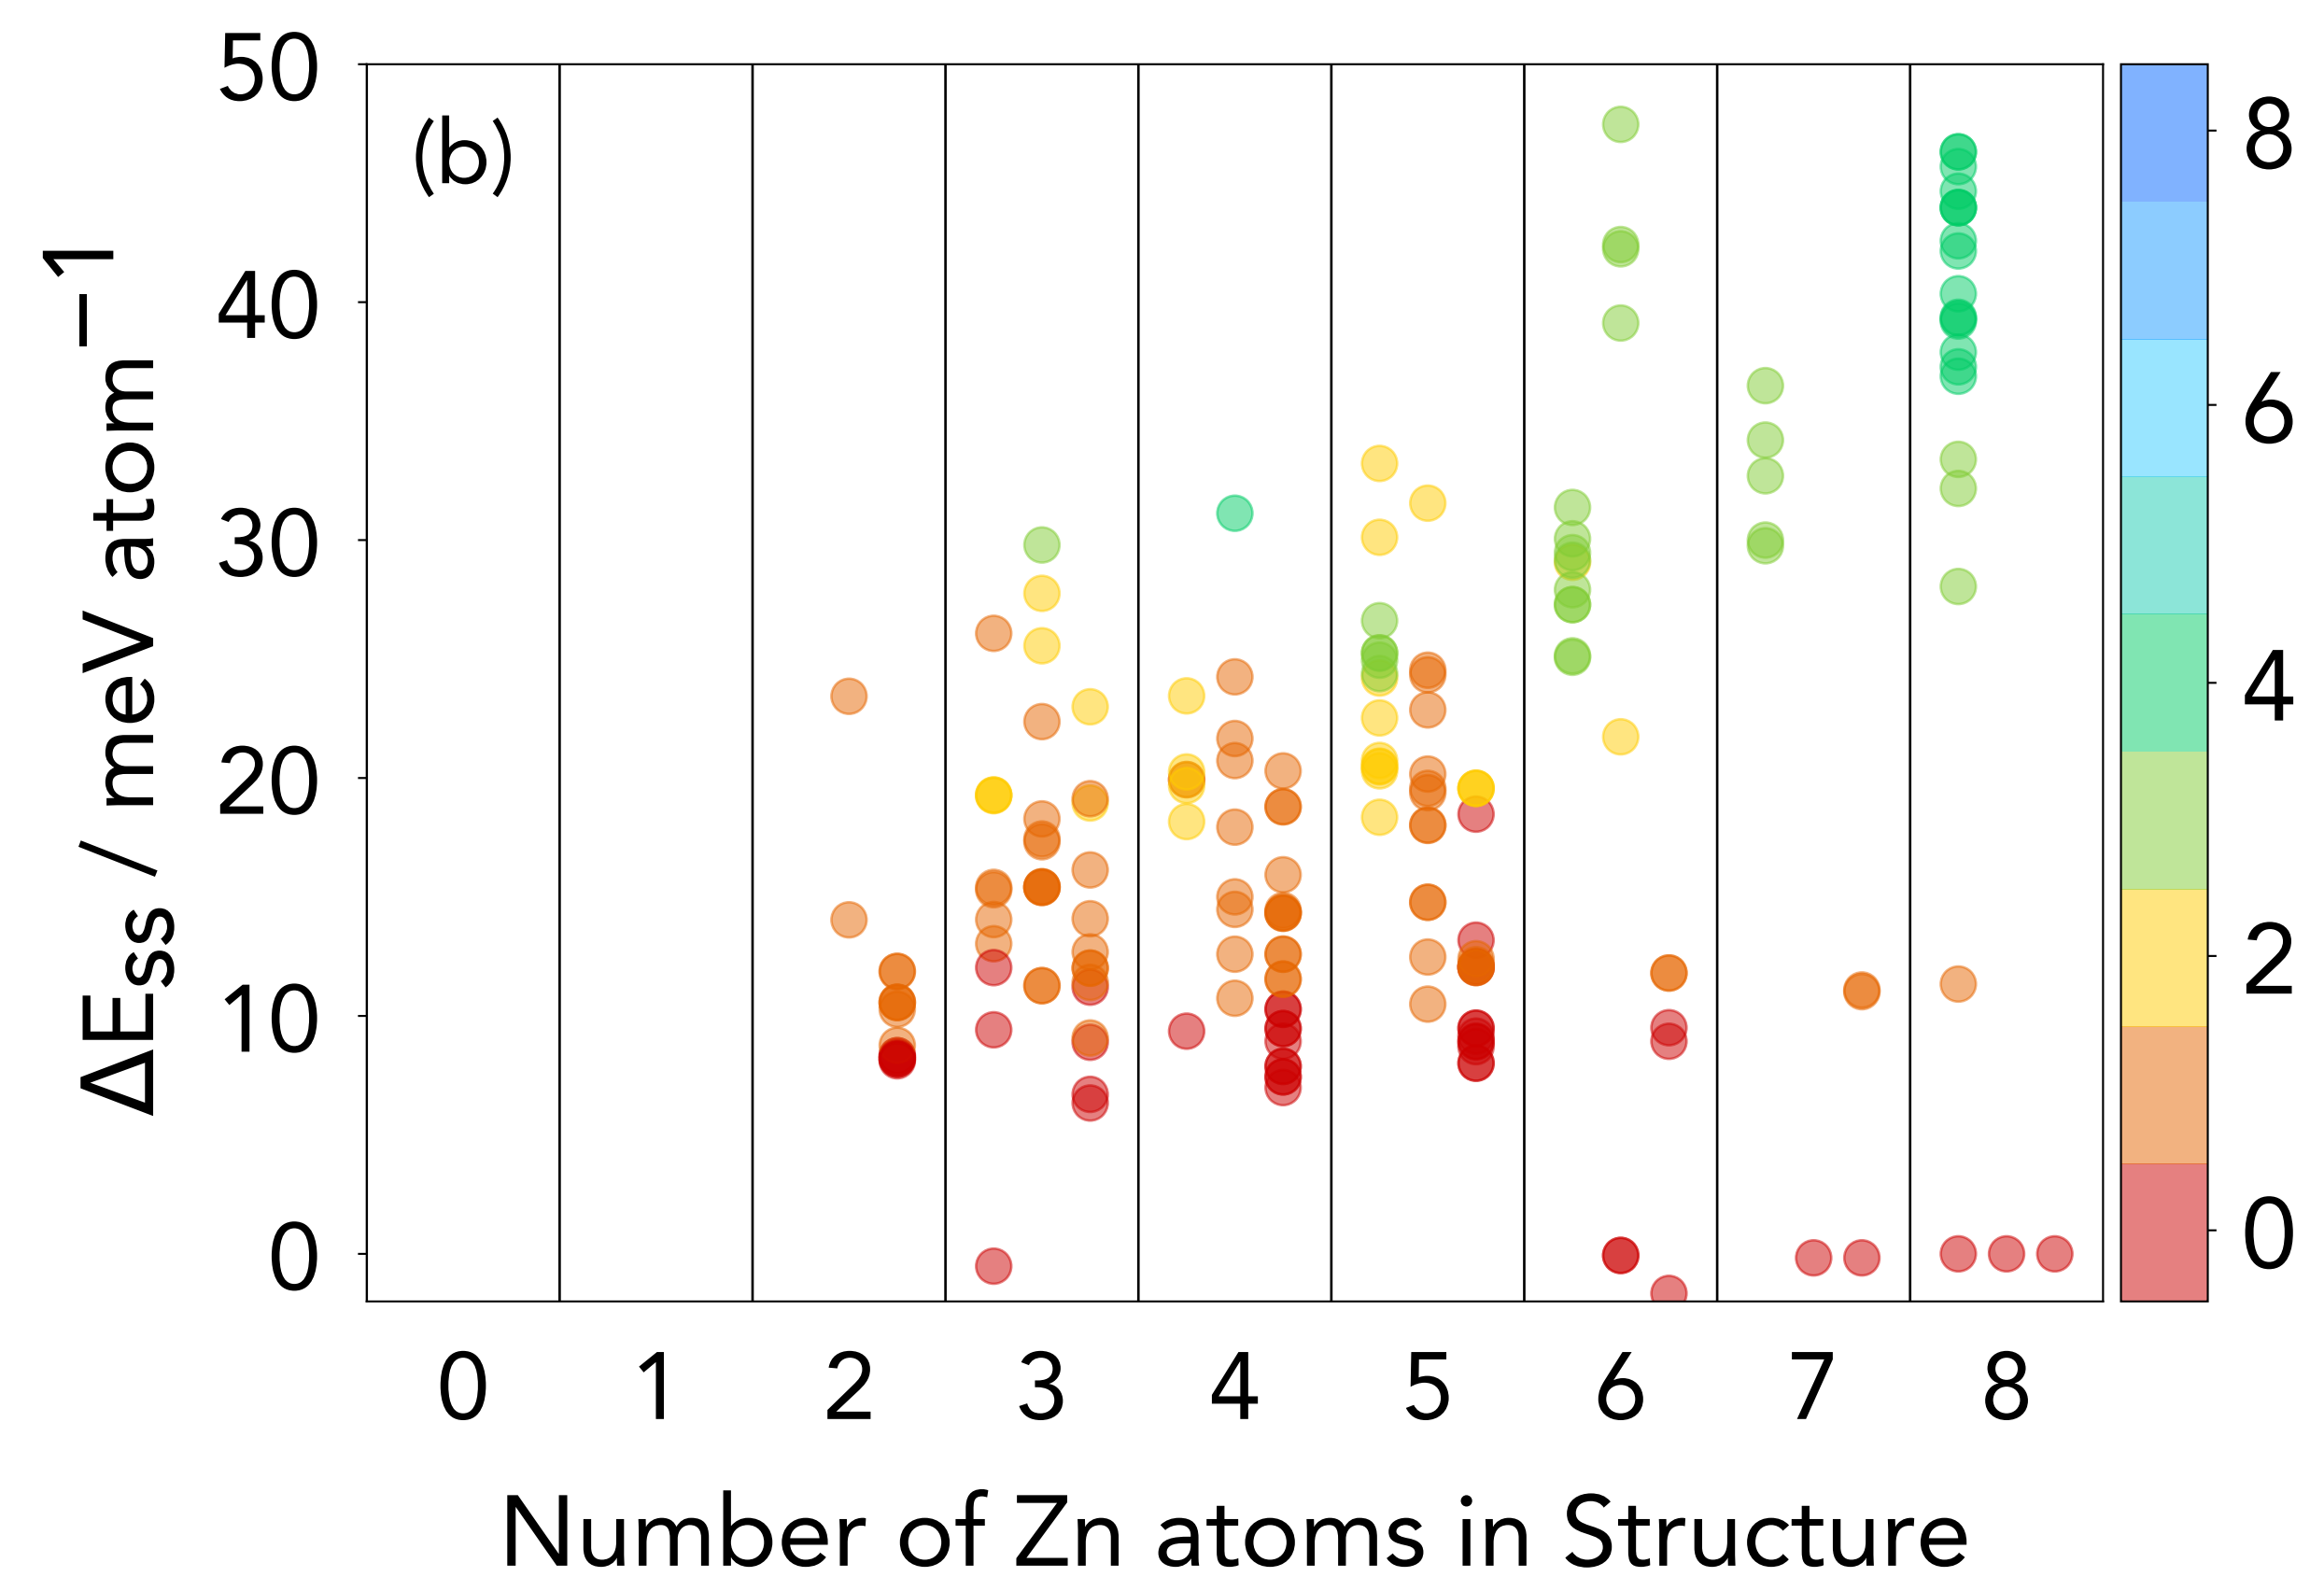

Supplement: d2cp02180c1.zip [file d2cp02180c1.zip]

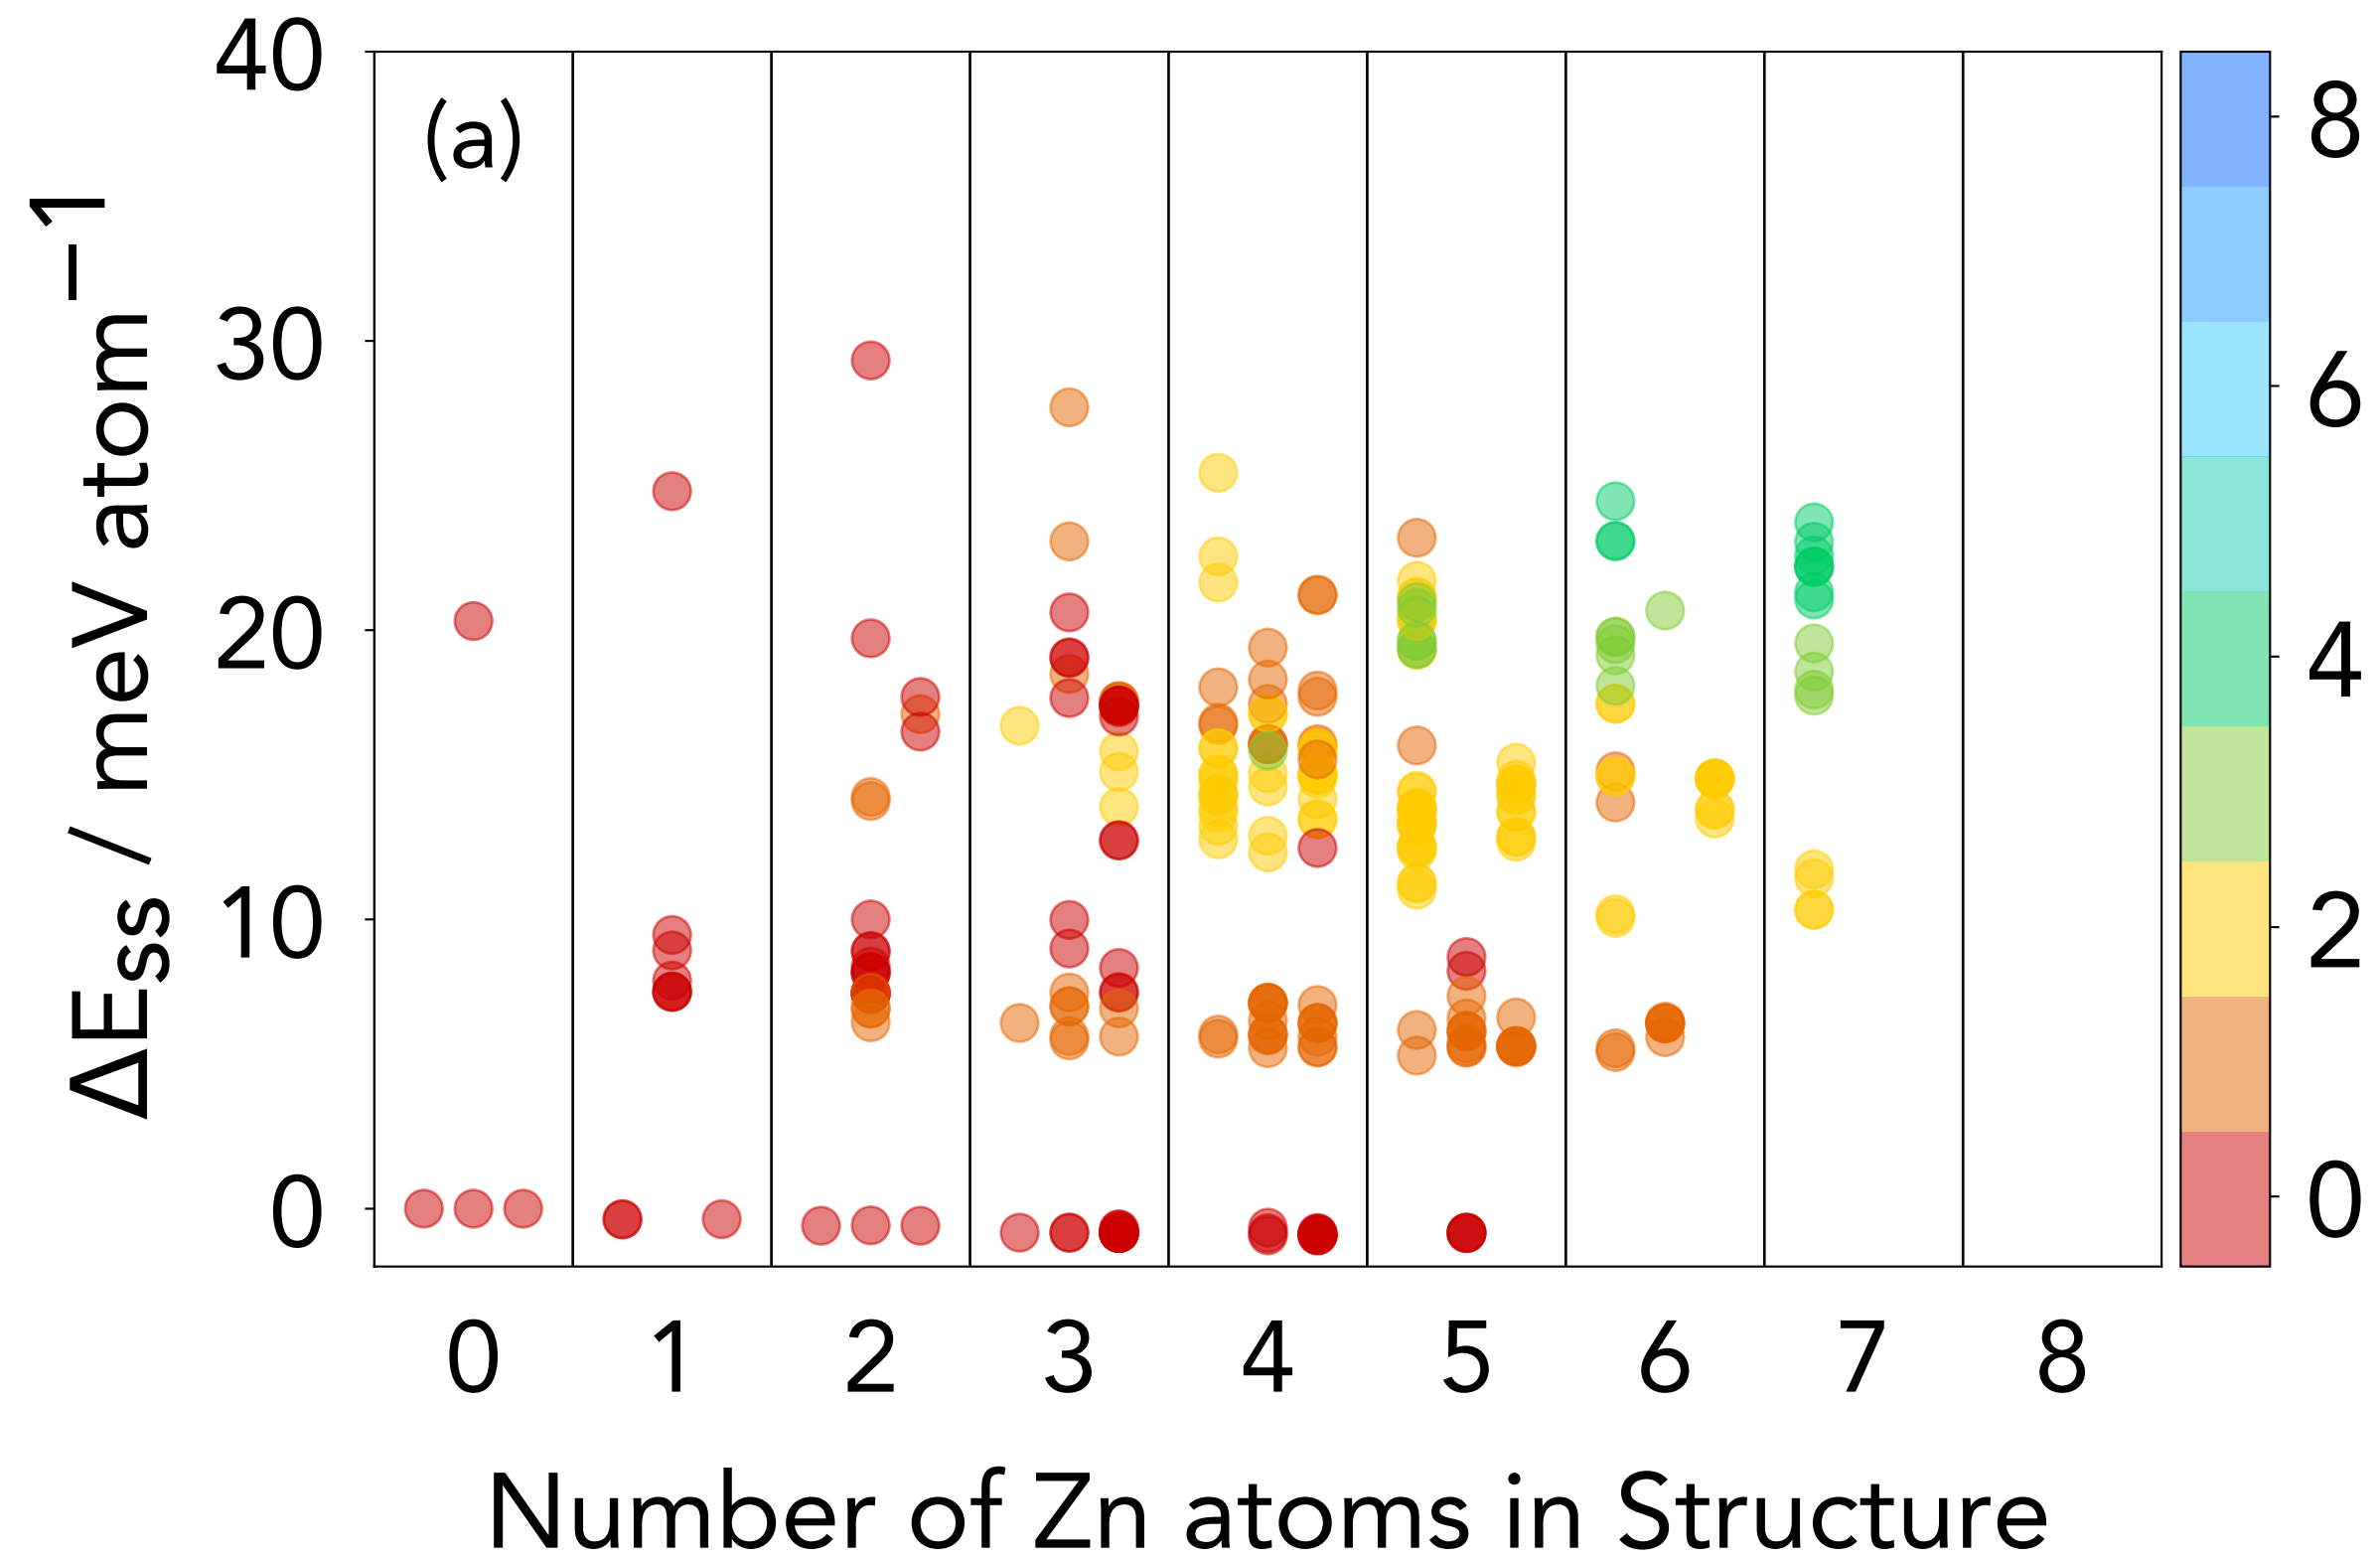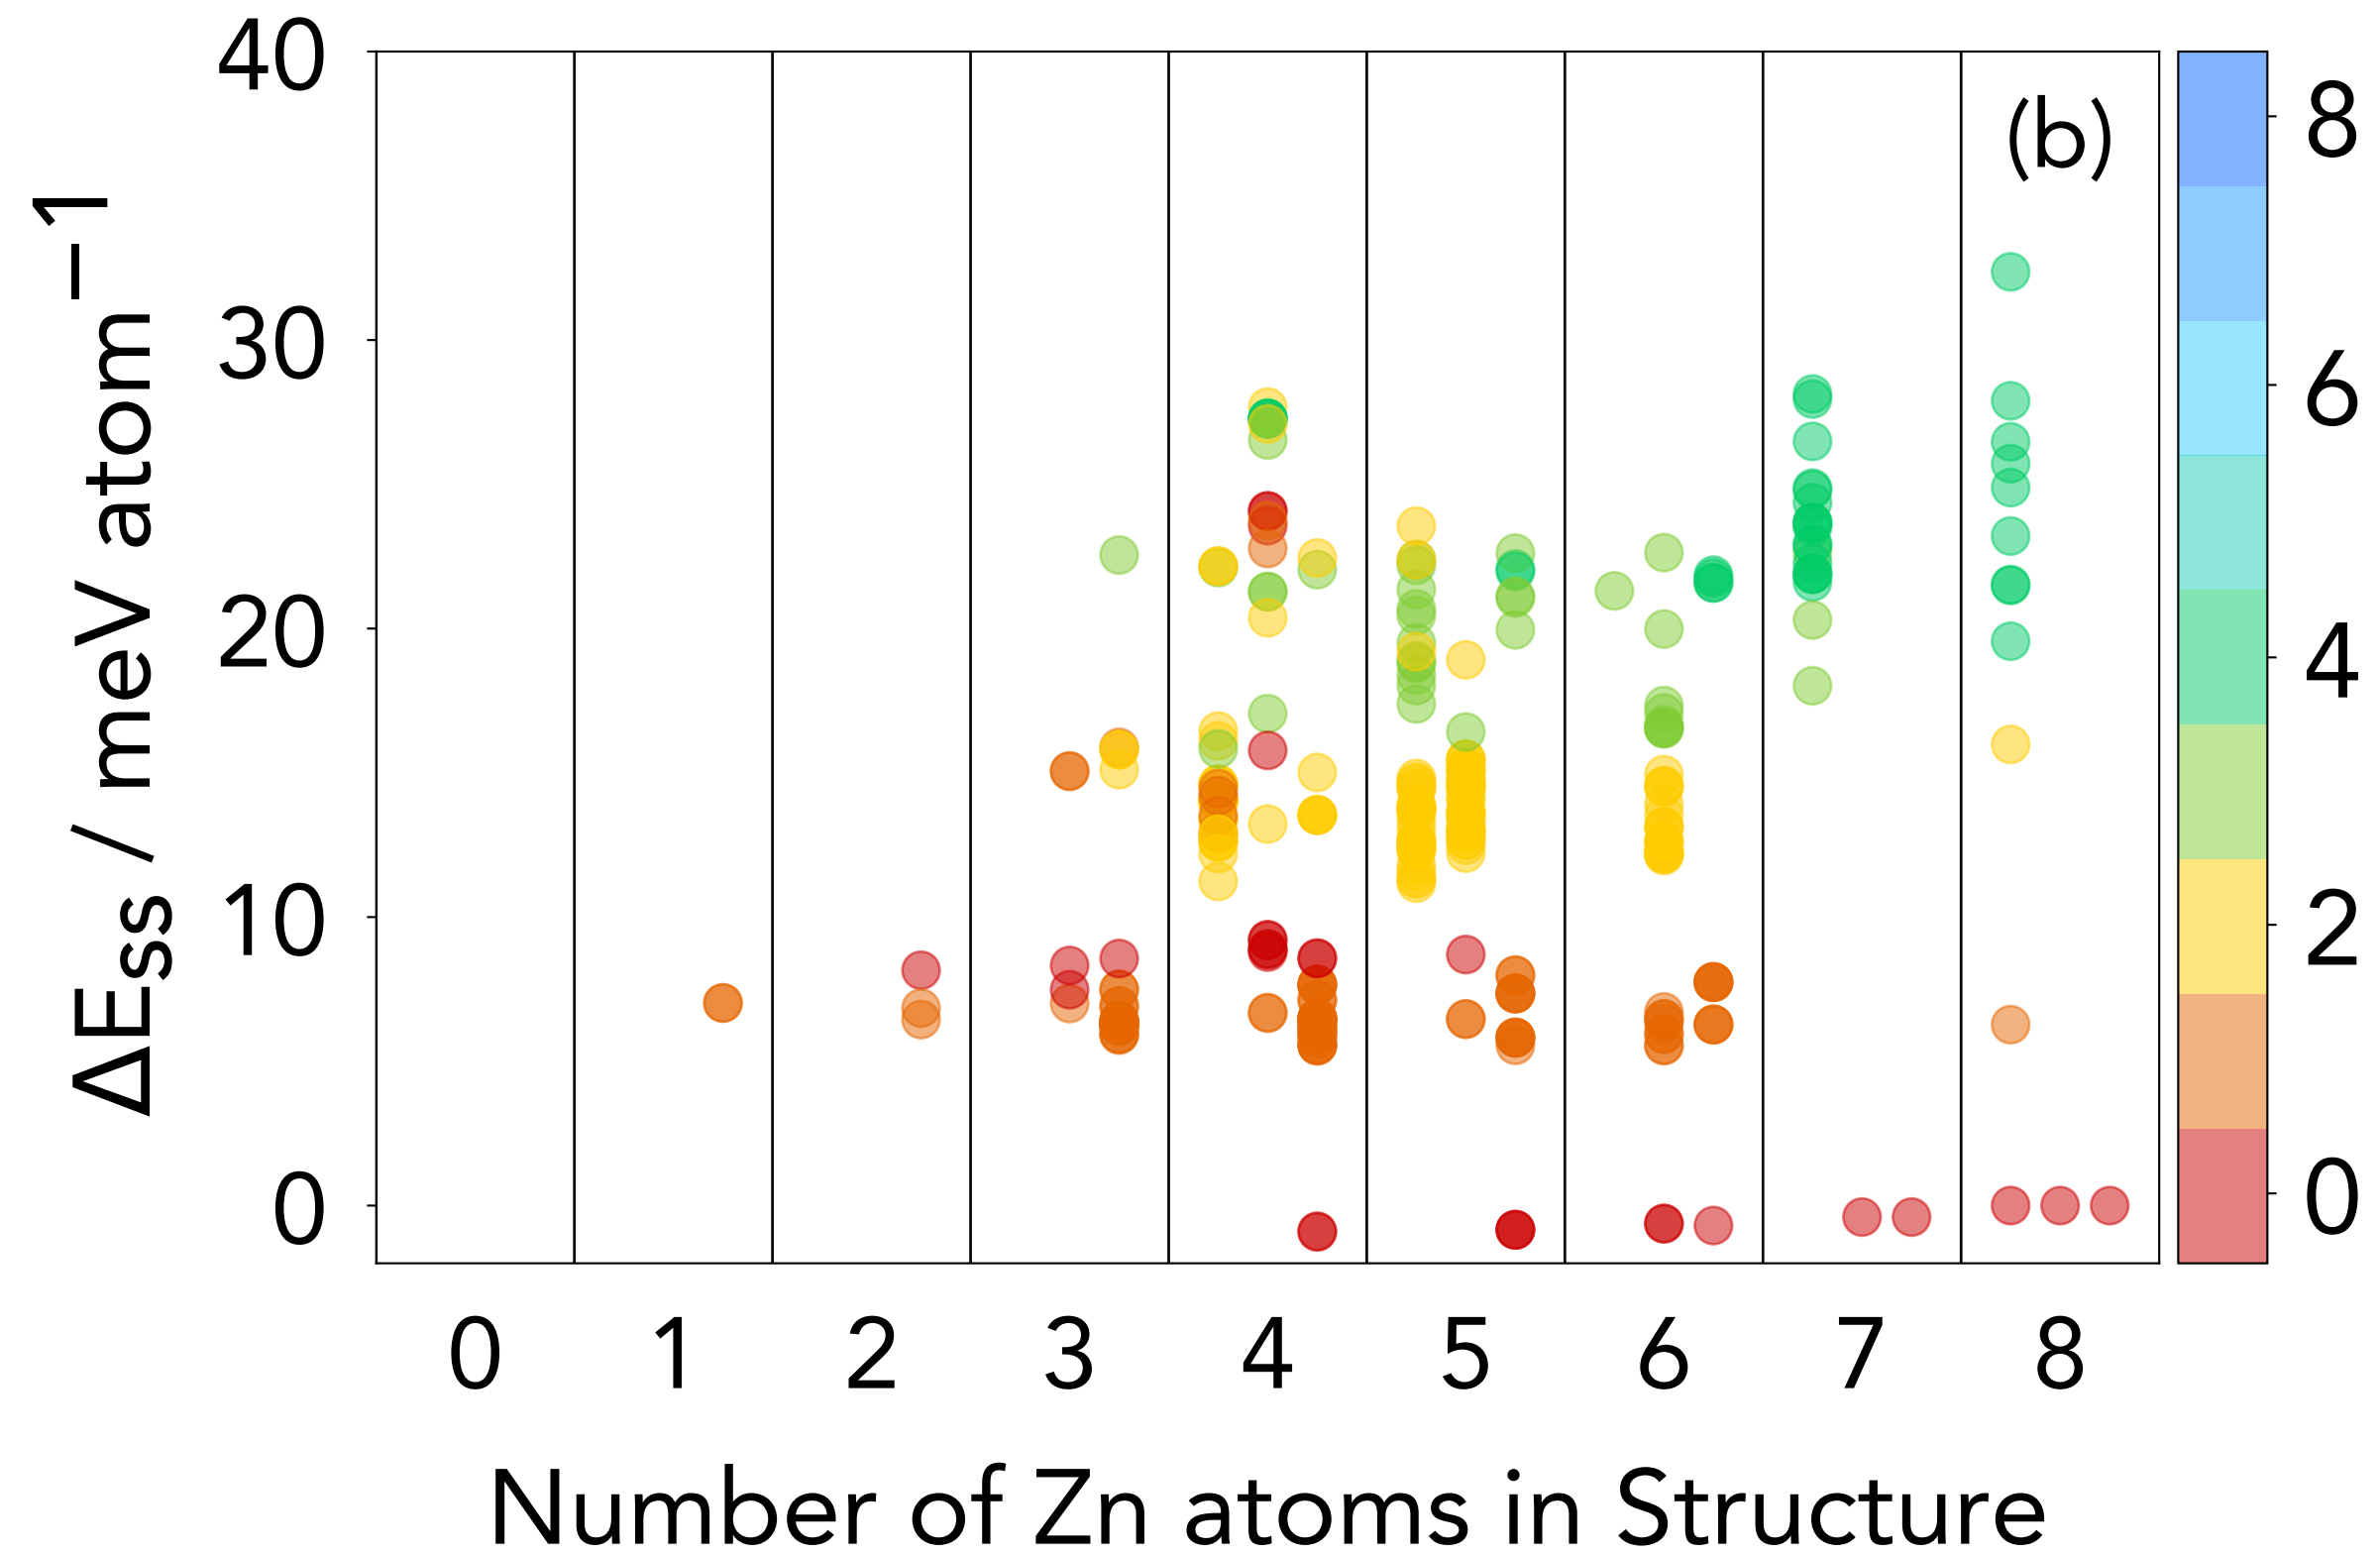

Supplement: d2cp02180c1.zip [file d2cp02180c1.zip]

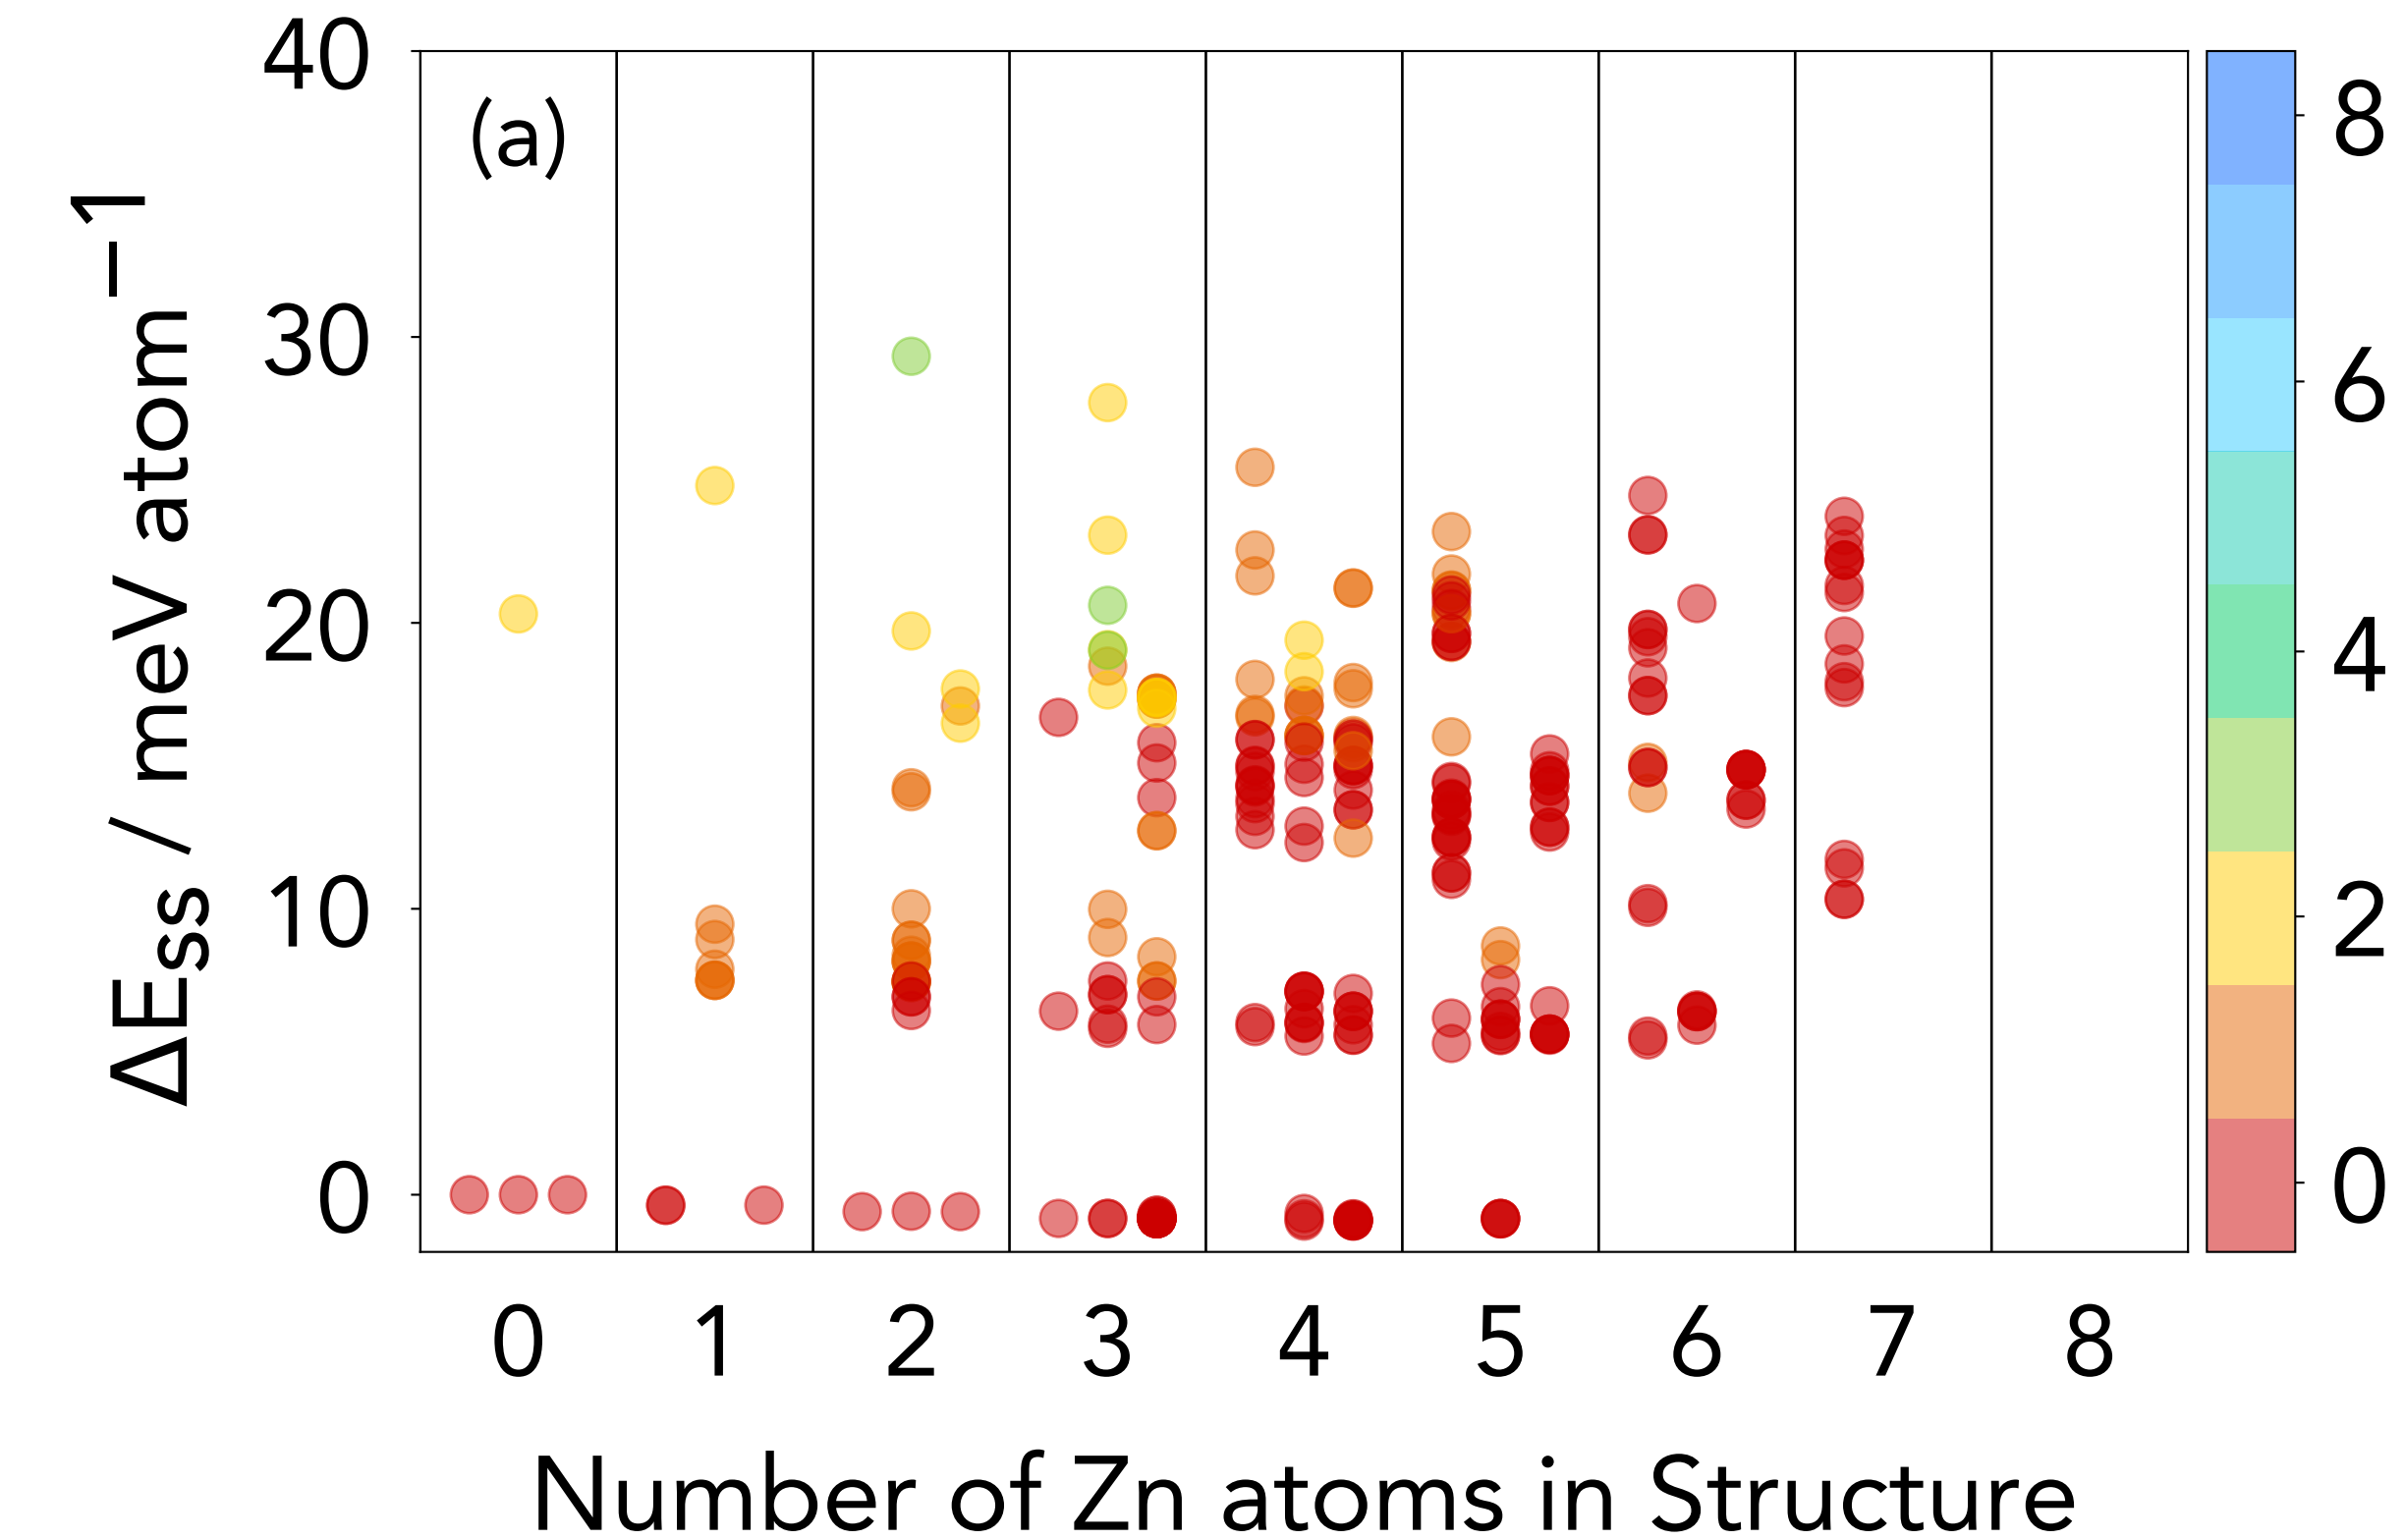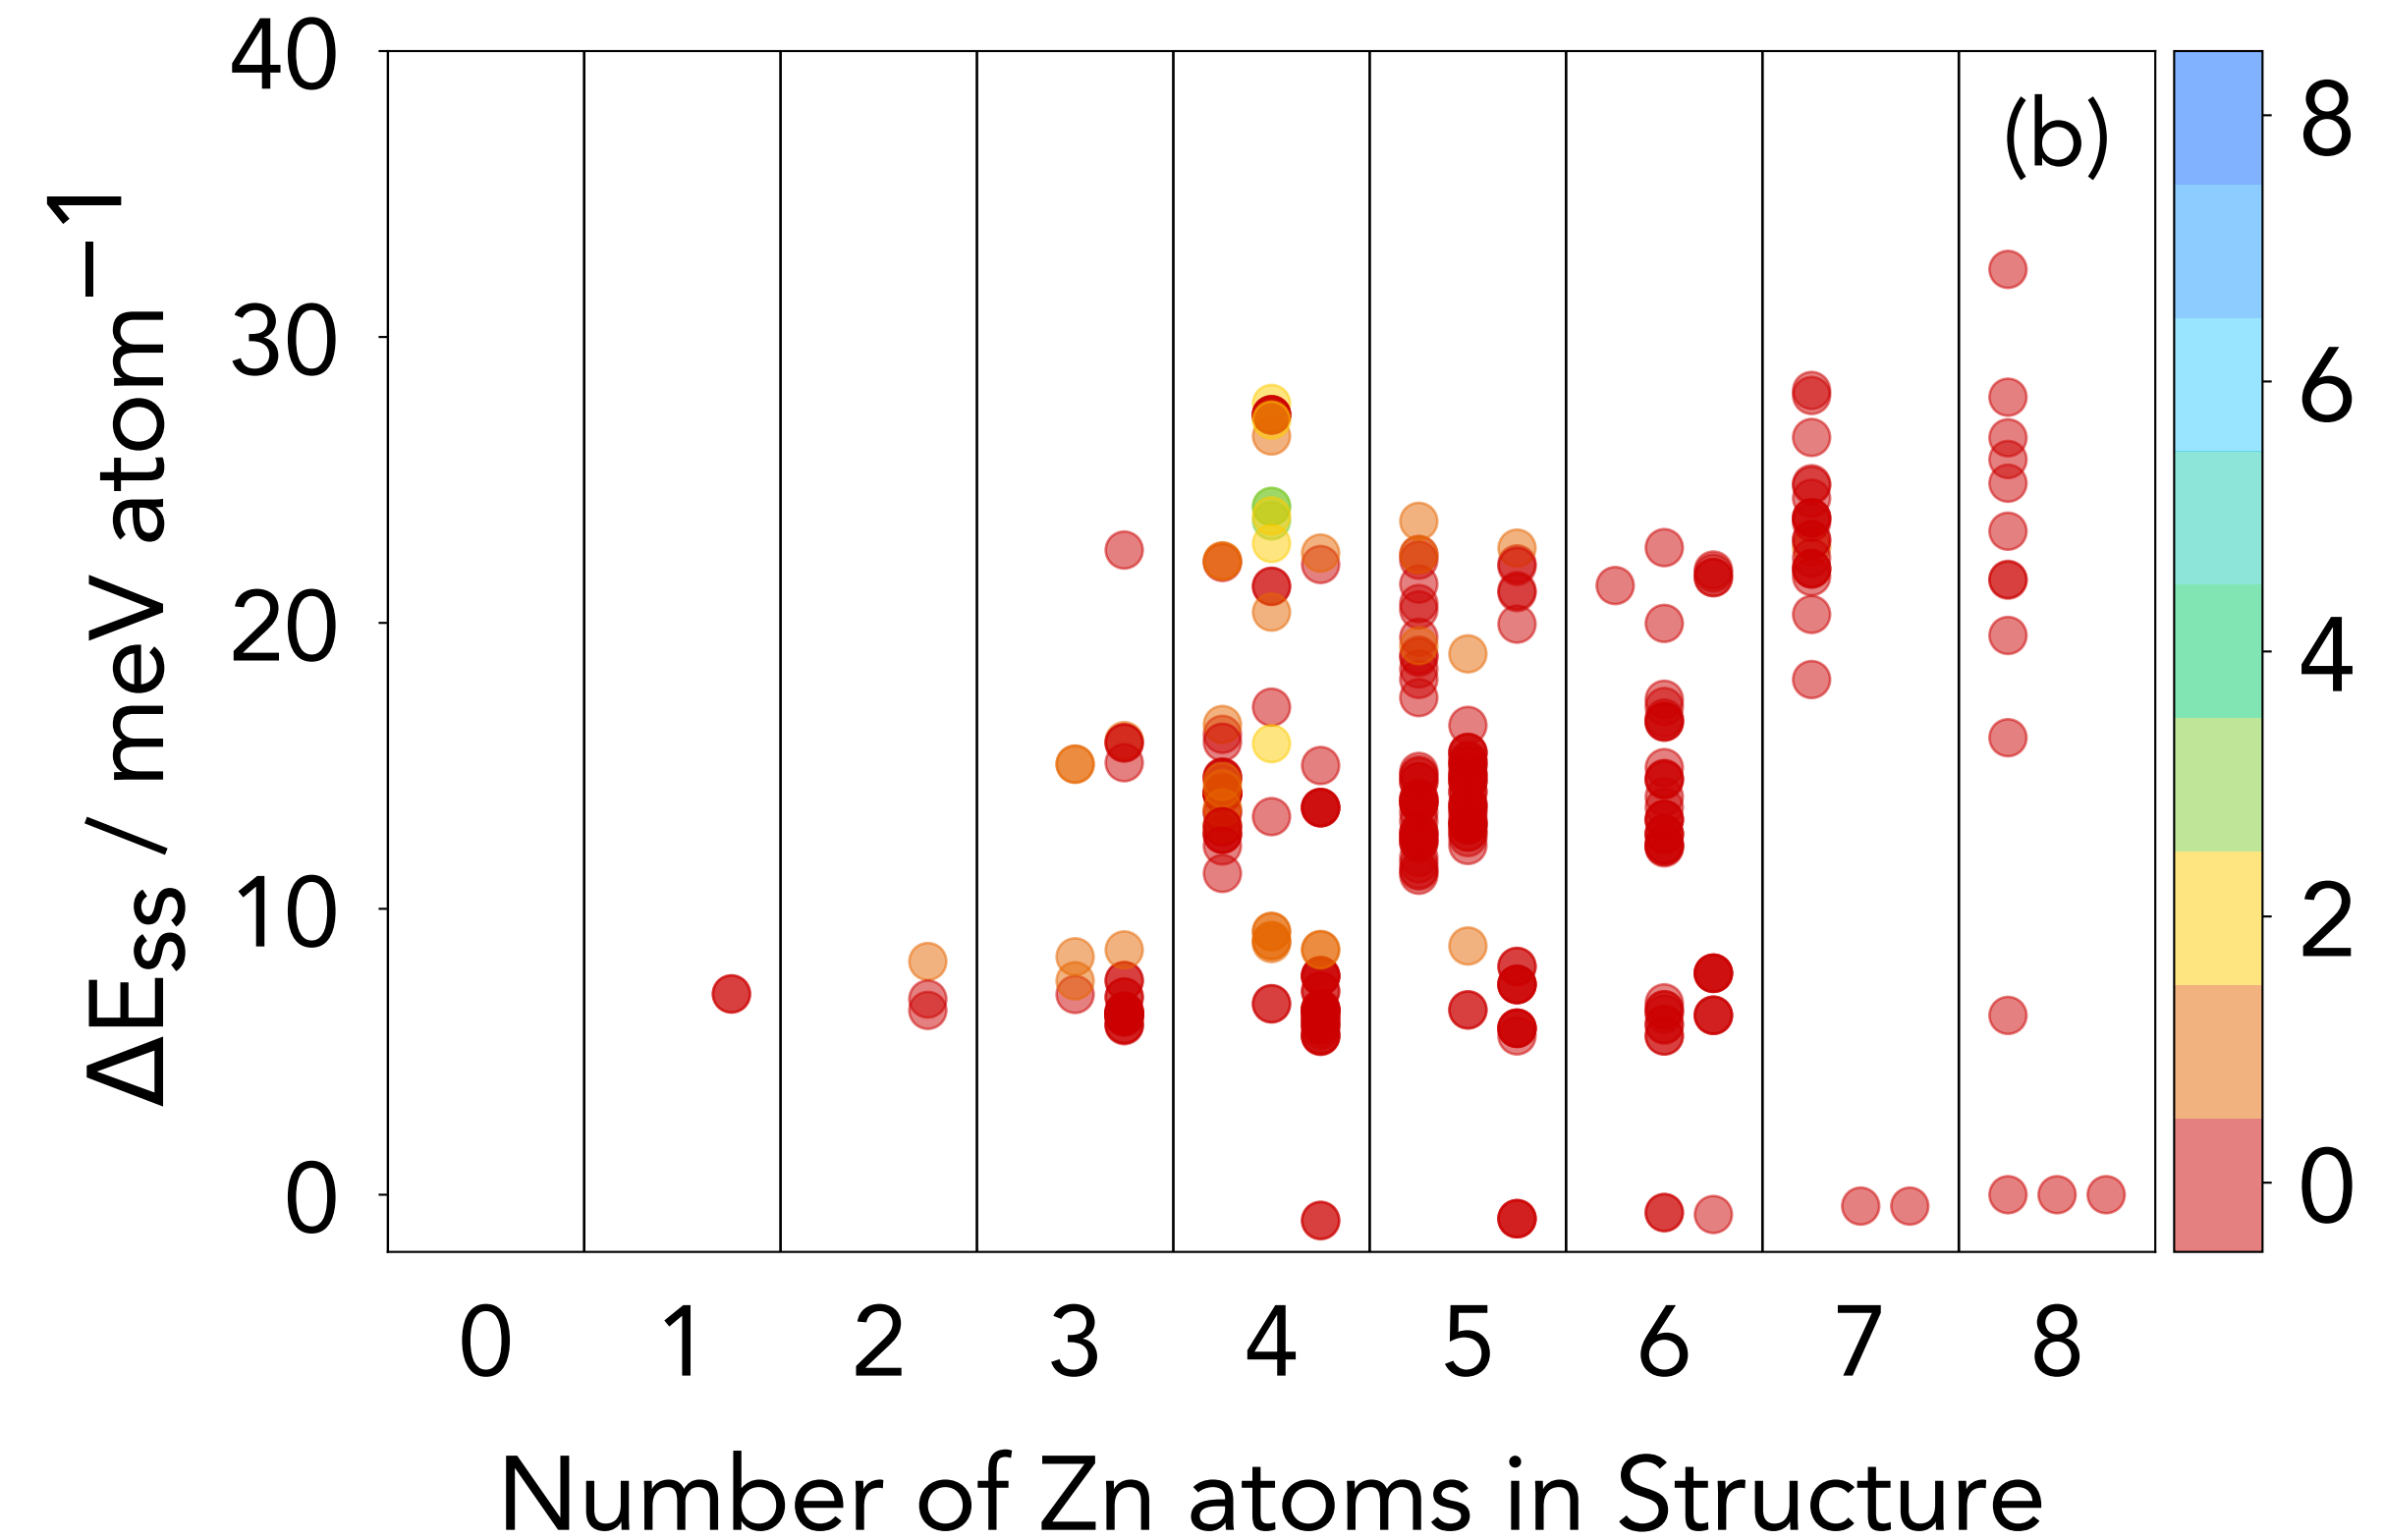

Supplement: d2cp02180c1.zip [file d2cp02180c1.zip]

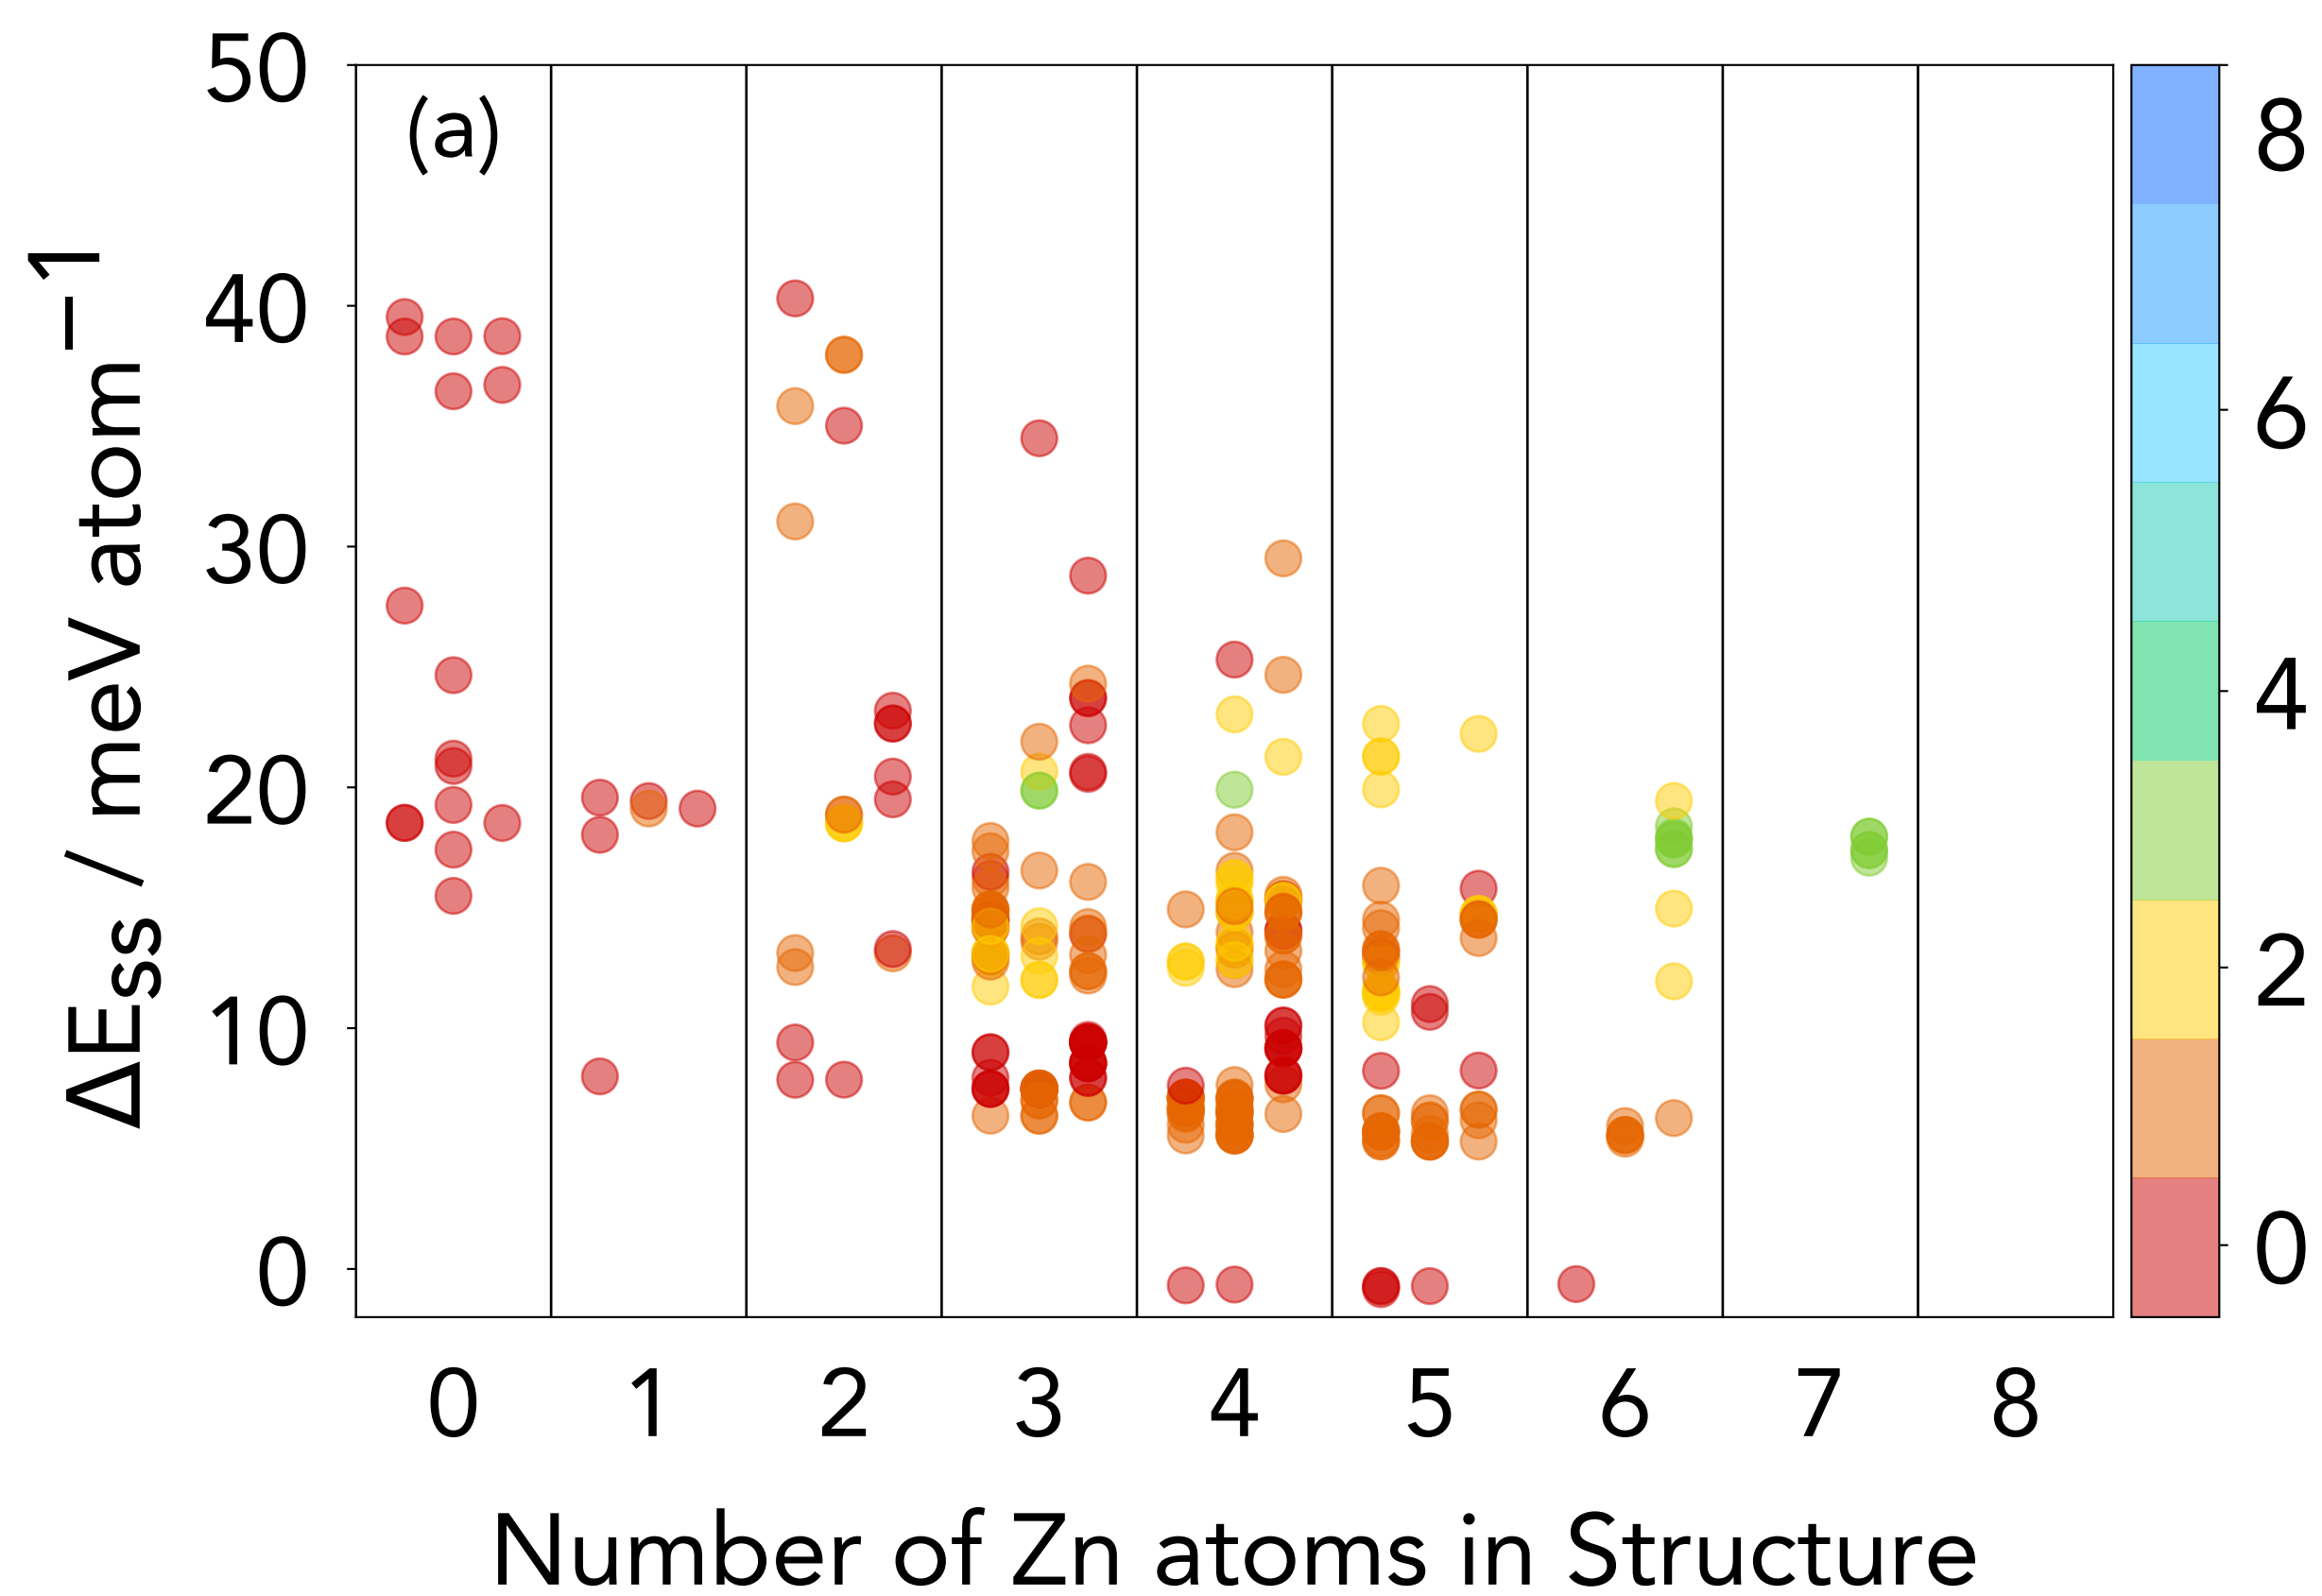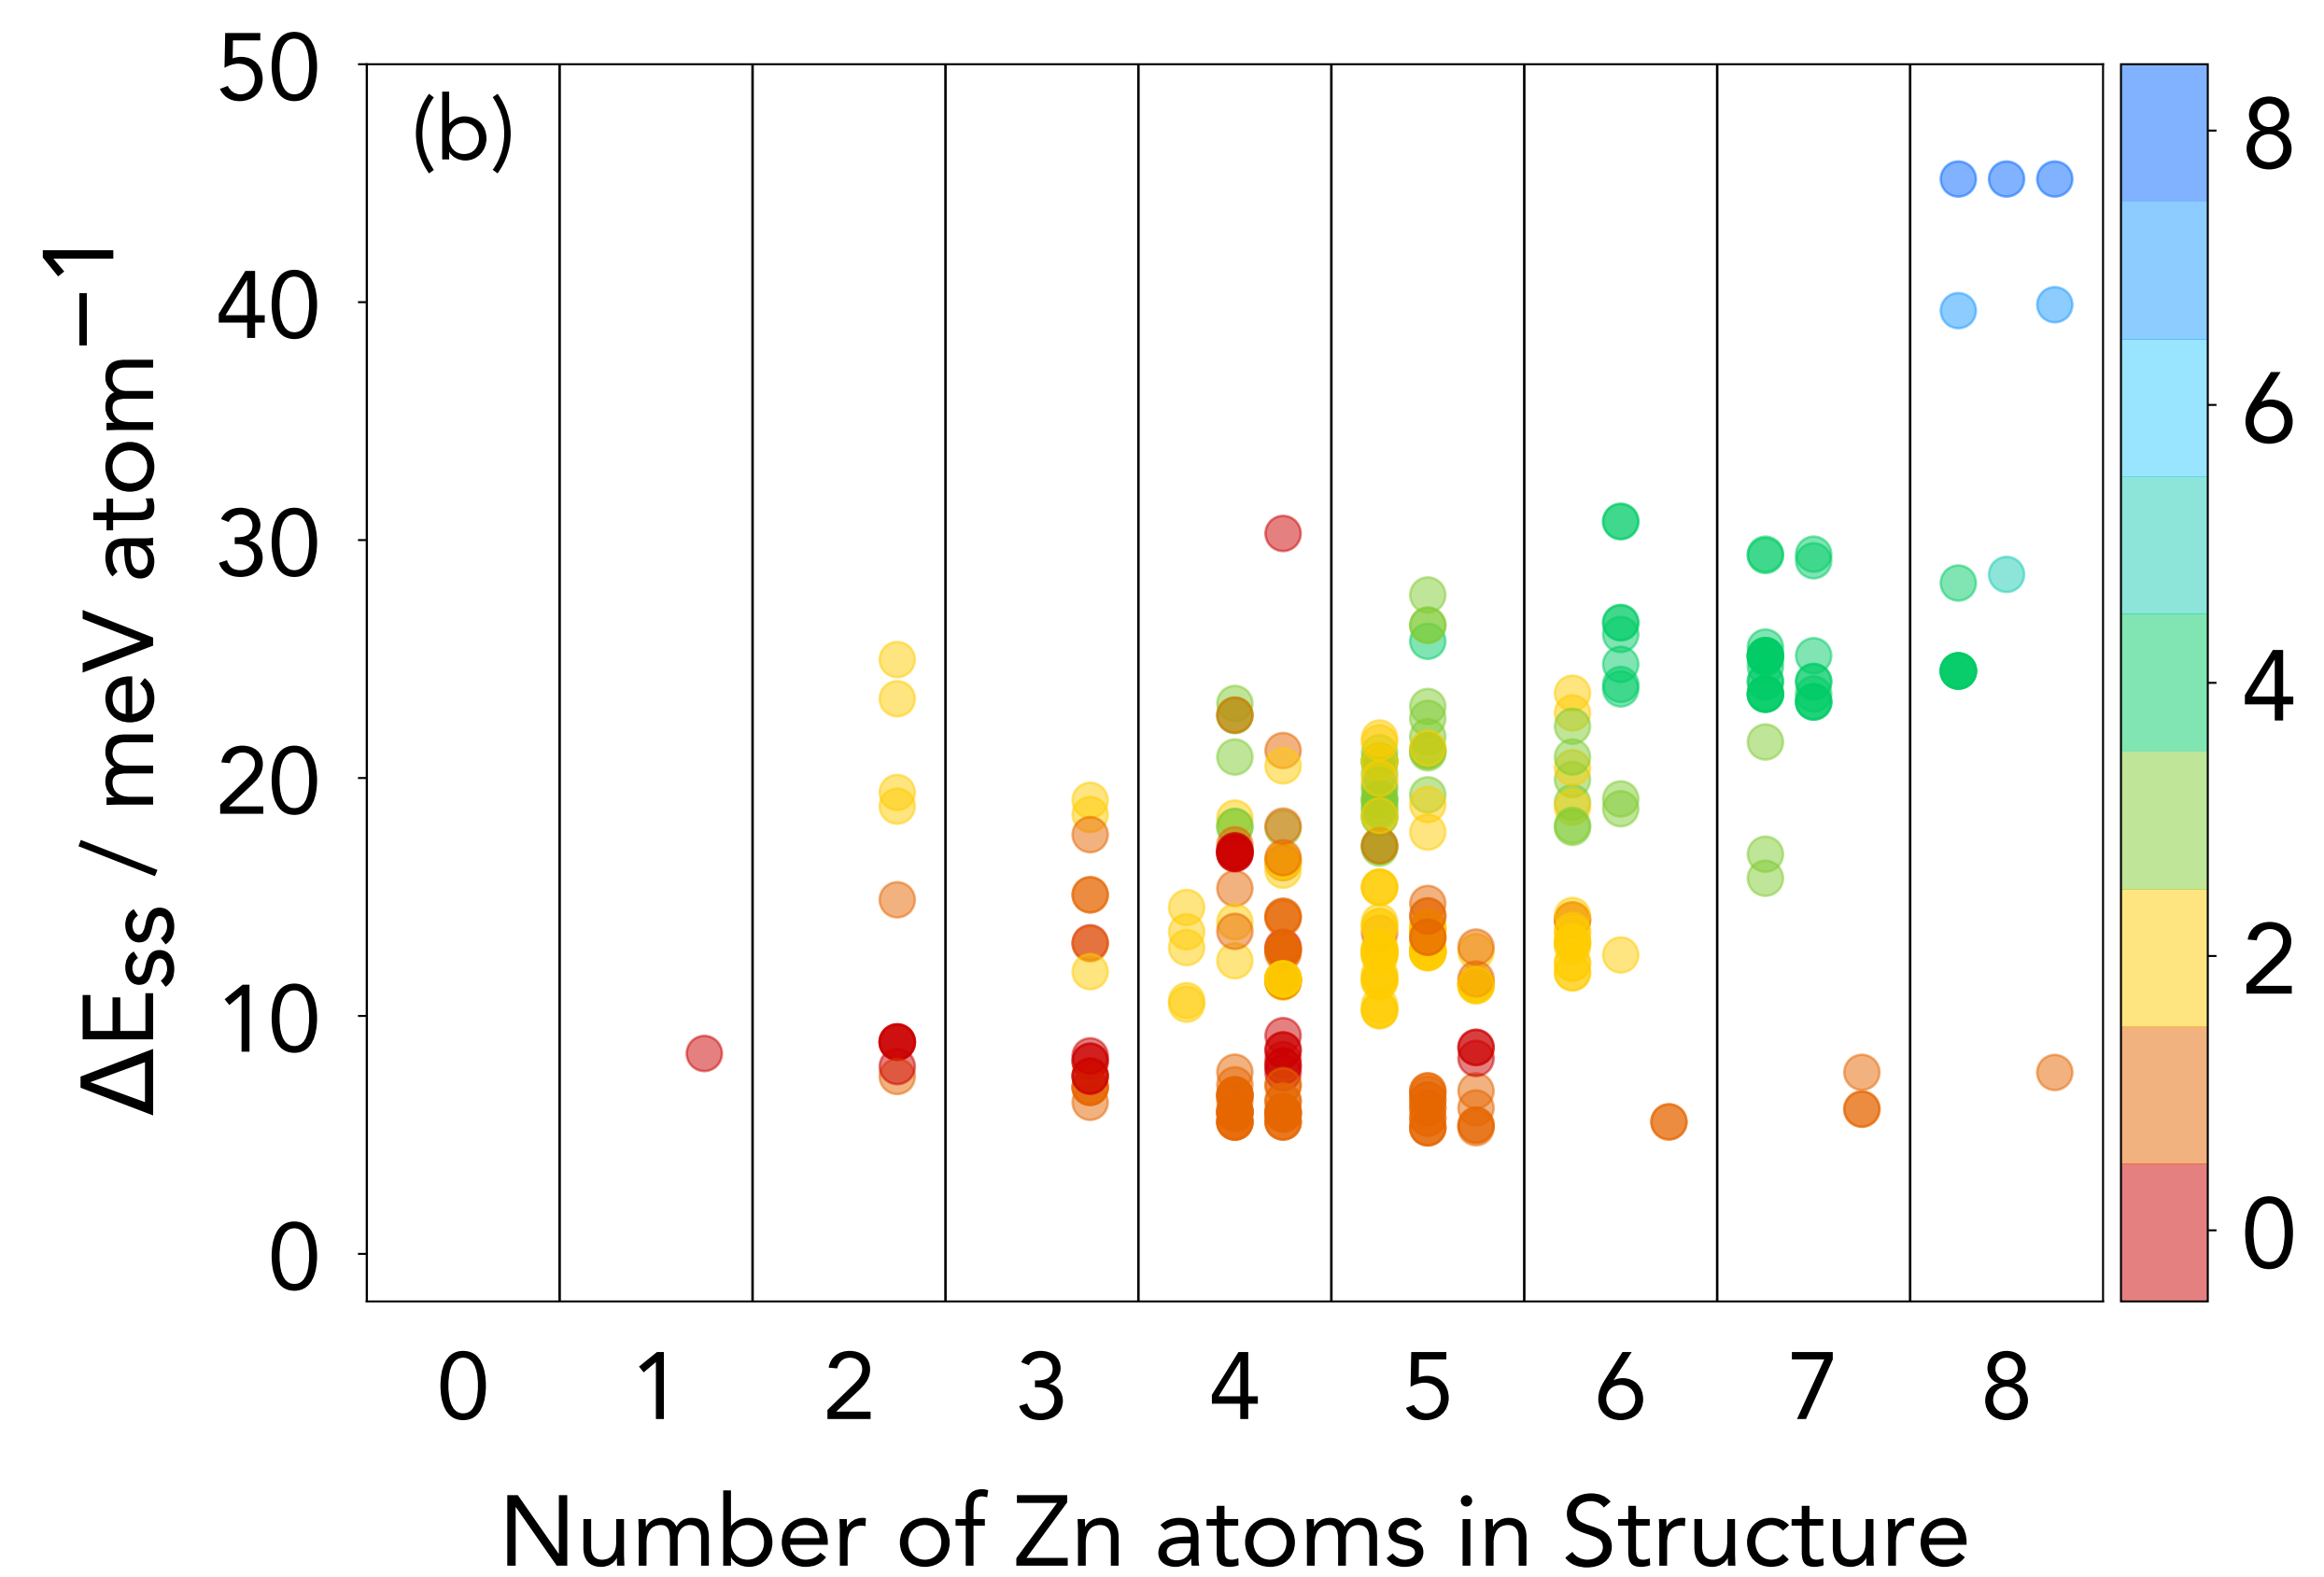

Supplement: d2cp02180c1.zip [file d2cp02180c1.zip]

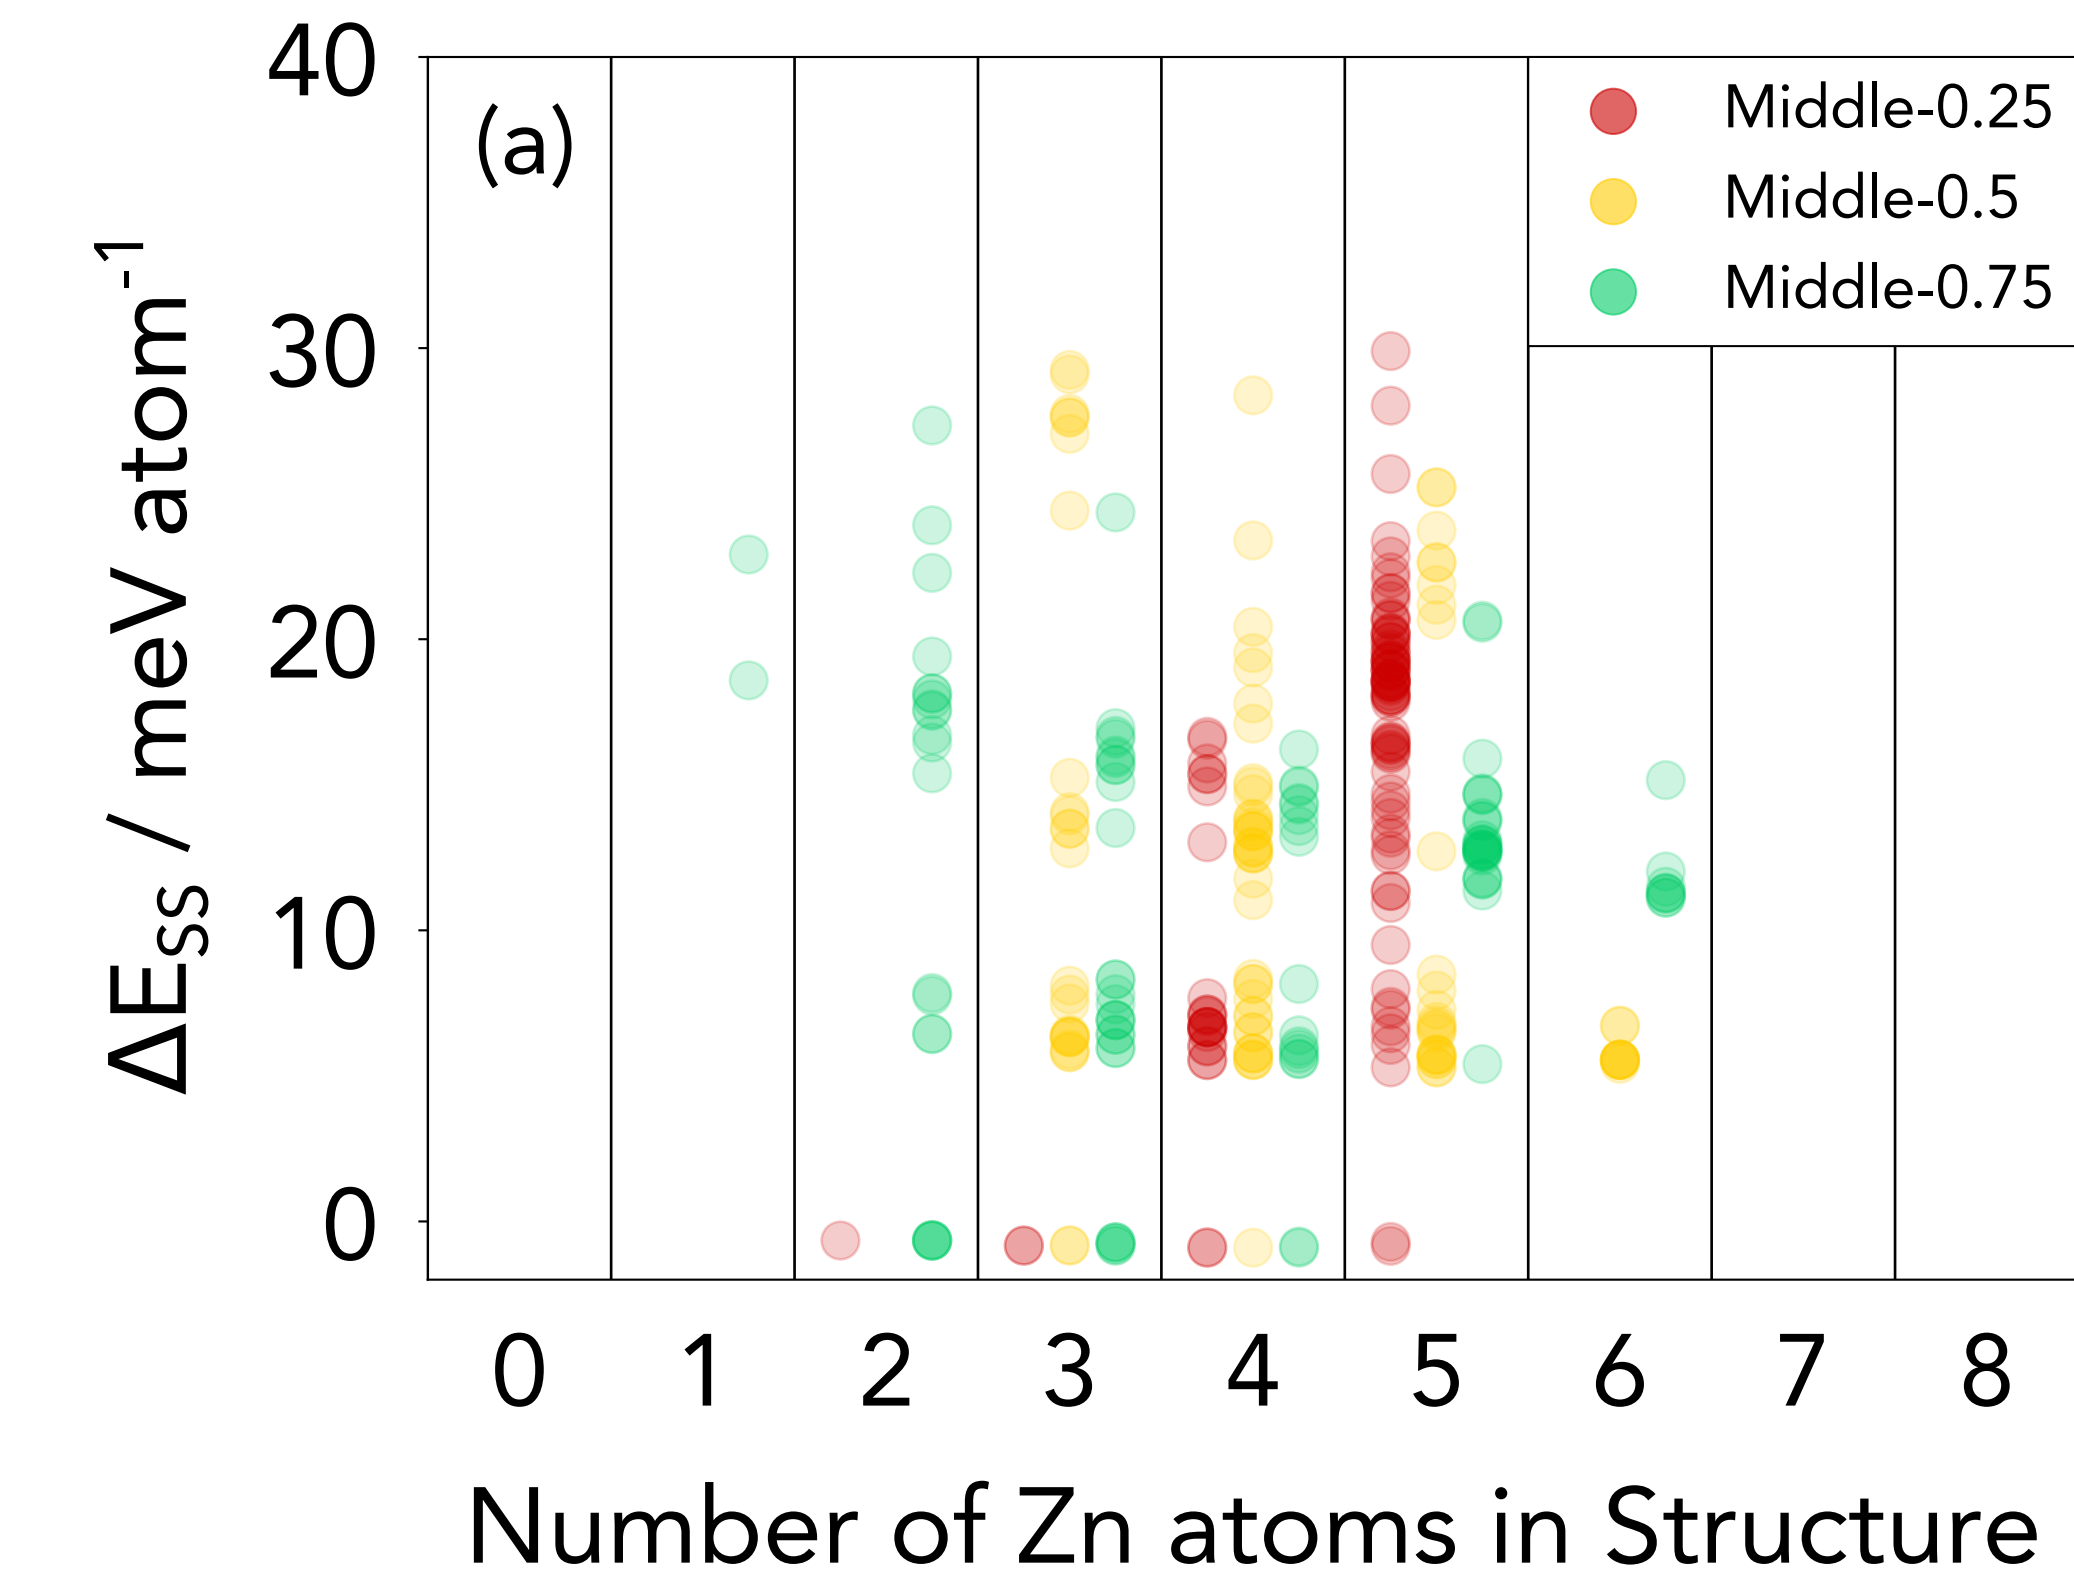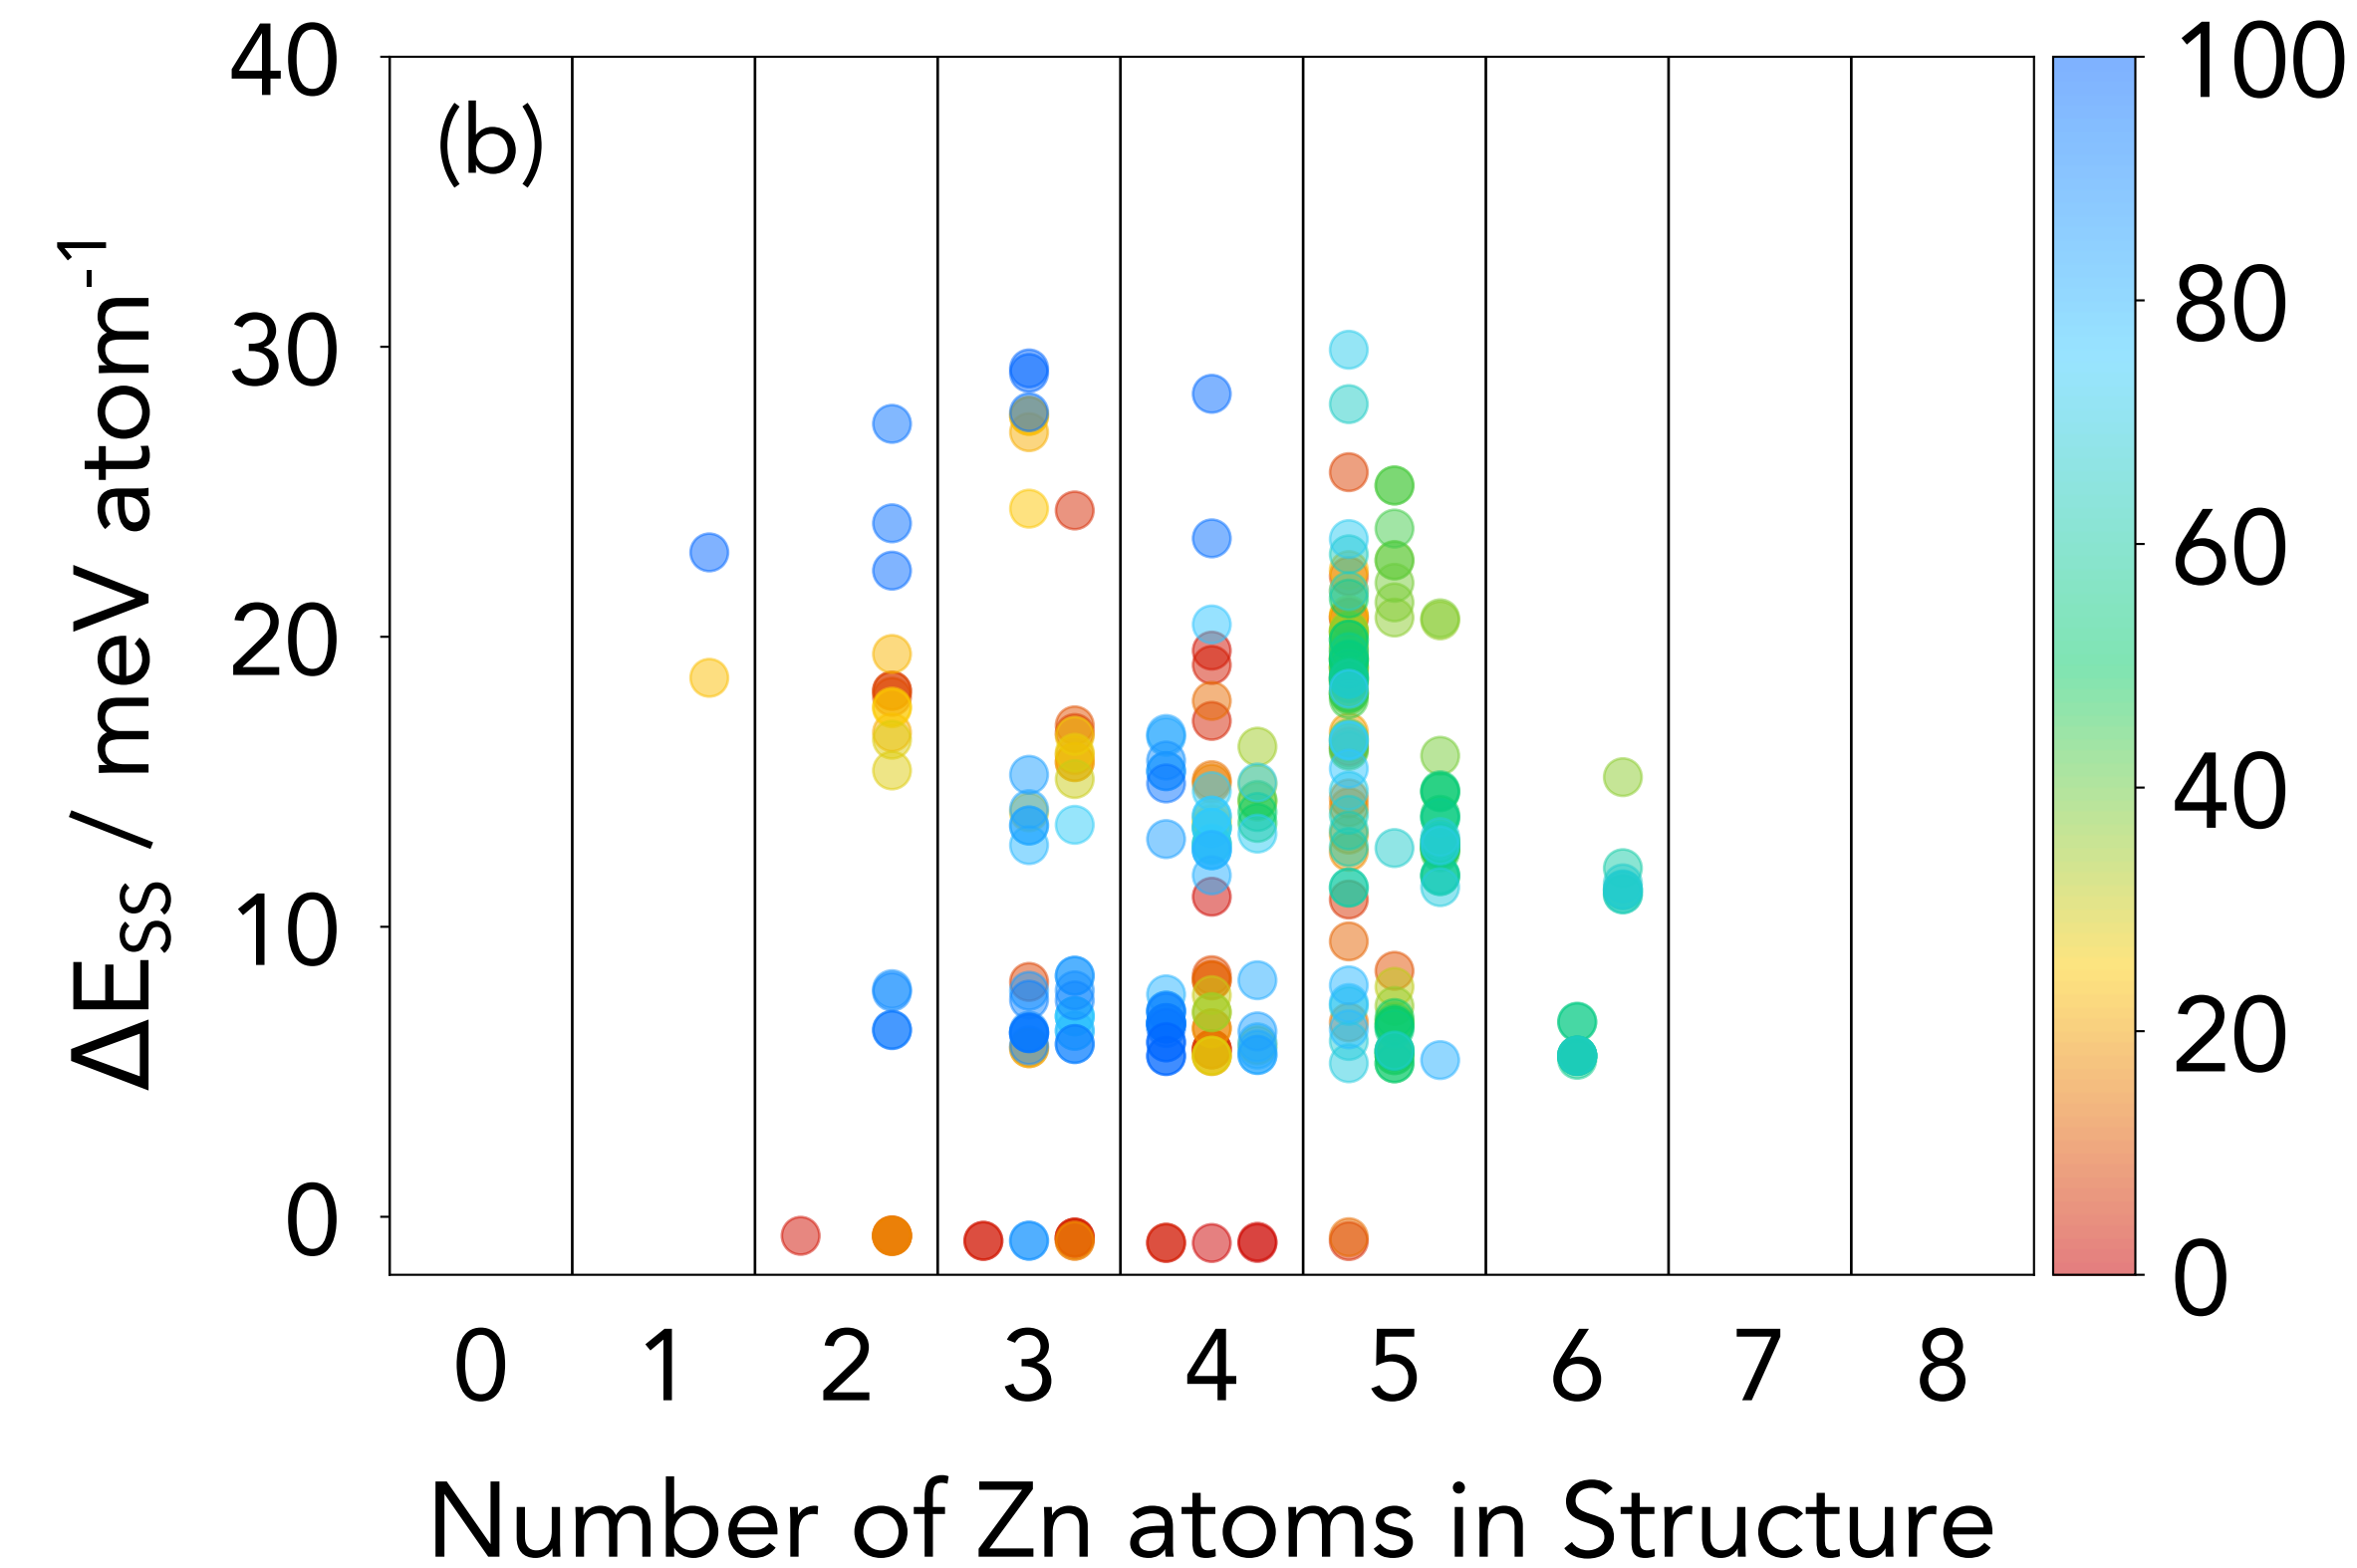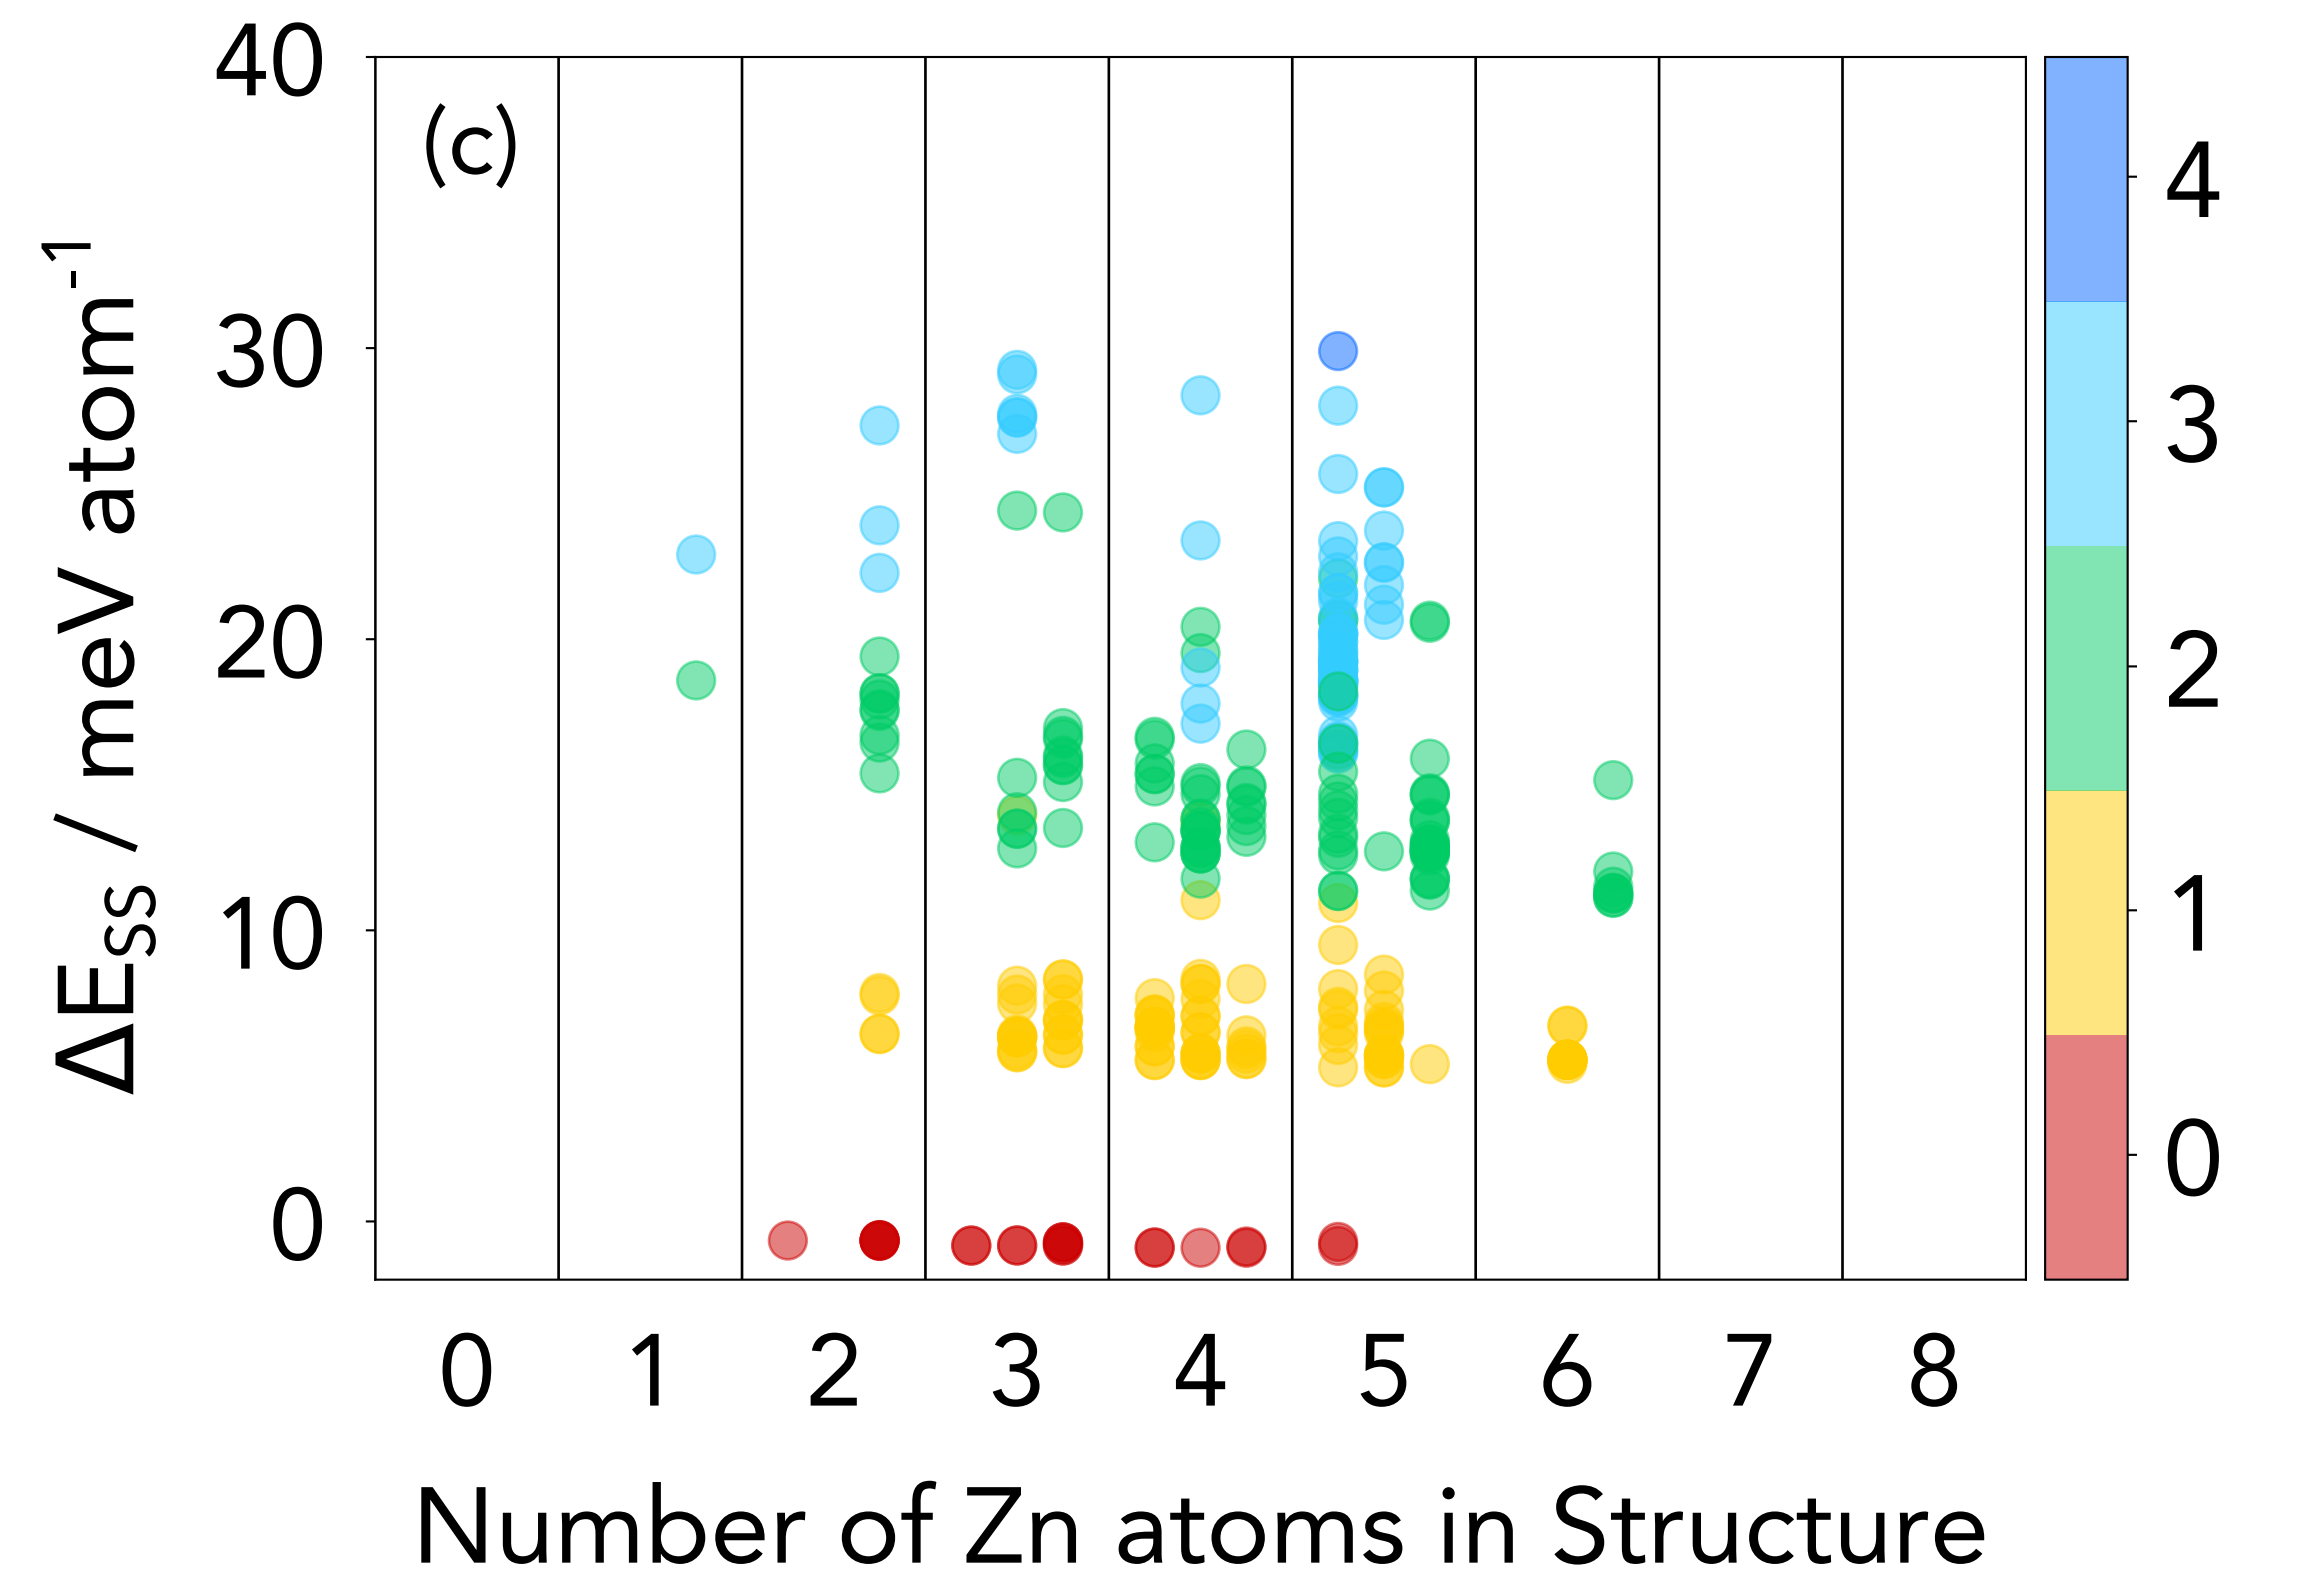

Supplement: d2cp02180c1.zip [file d2cp02180c1.zip]

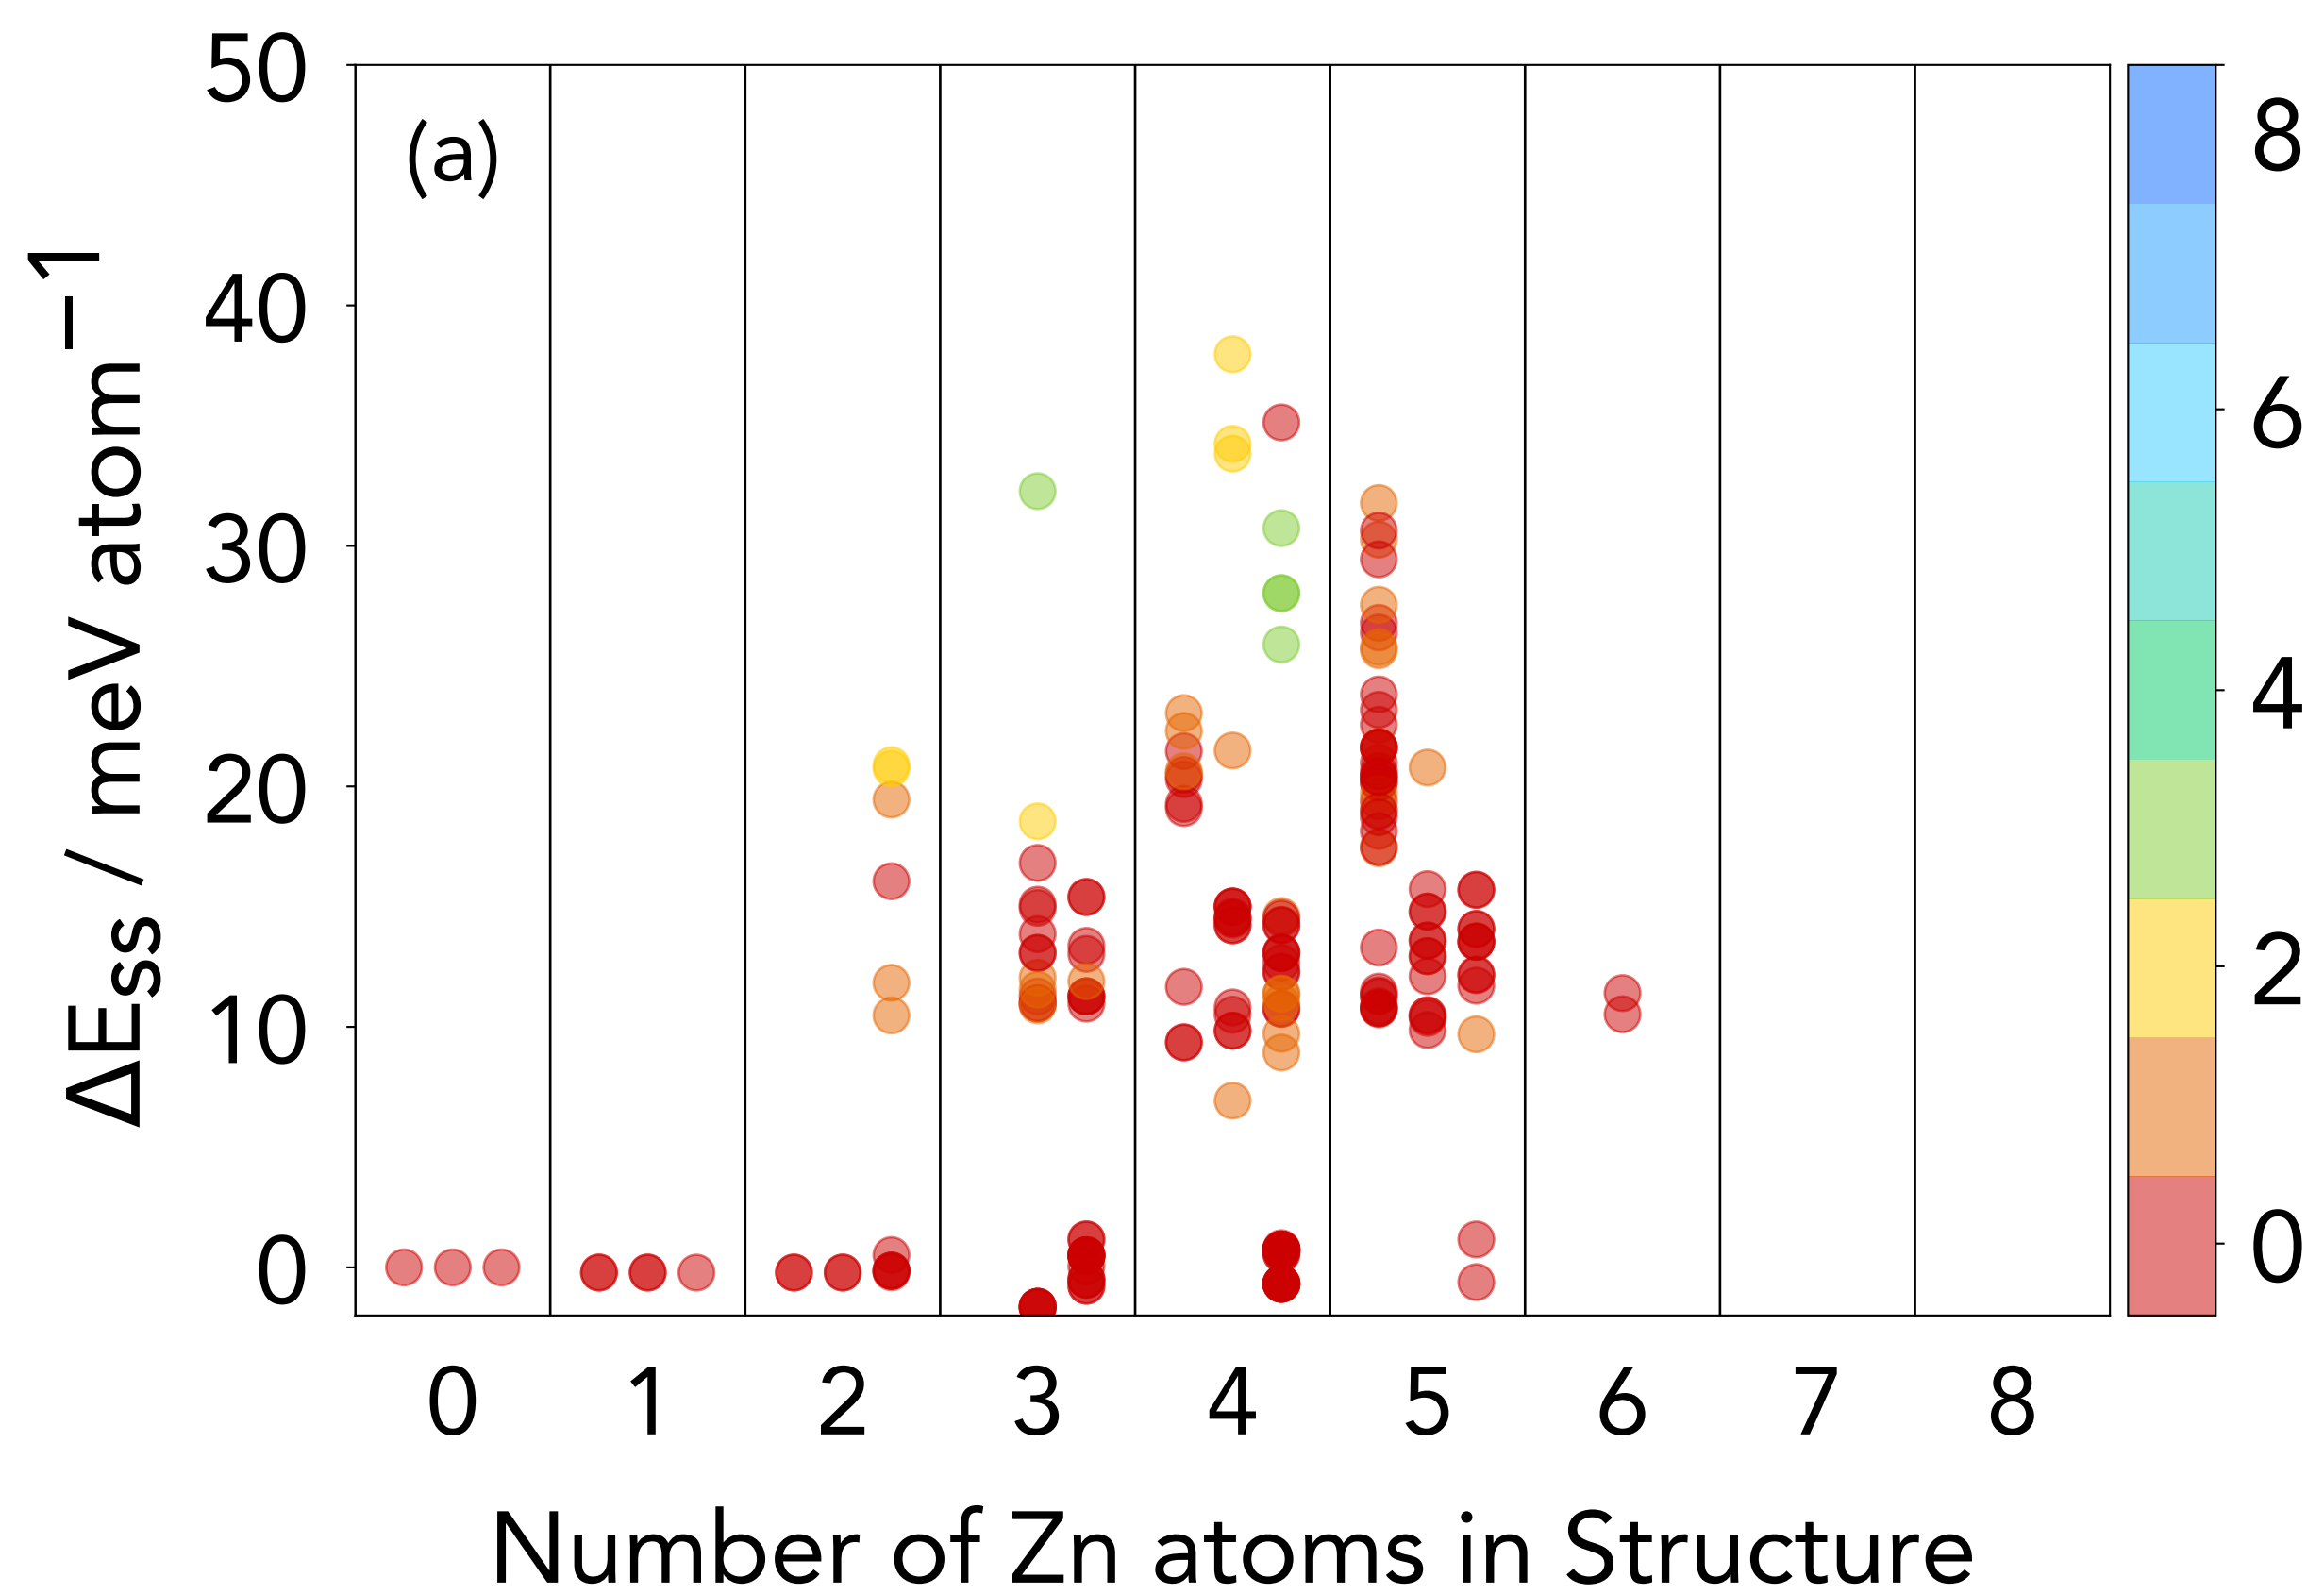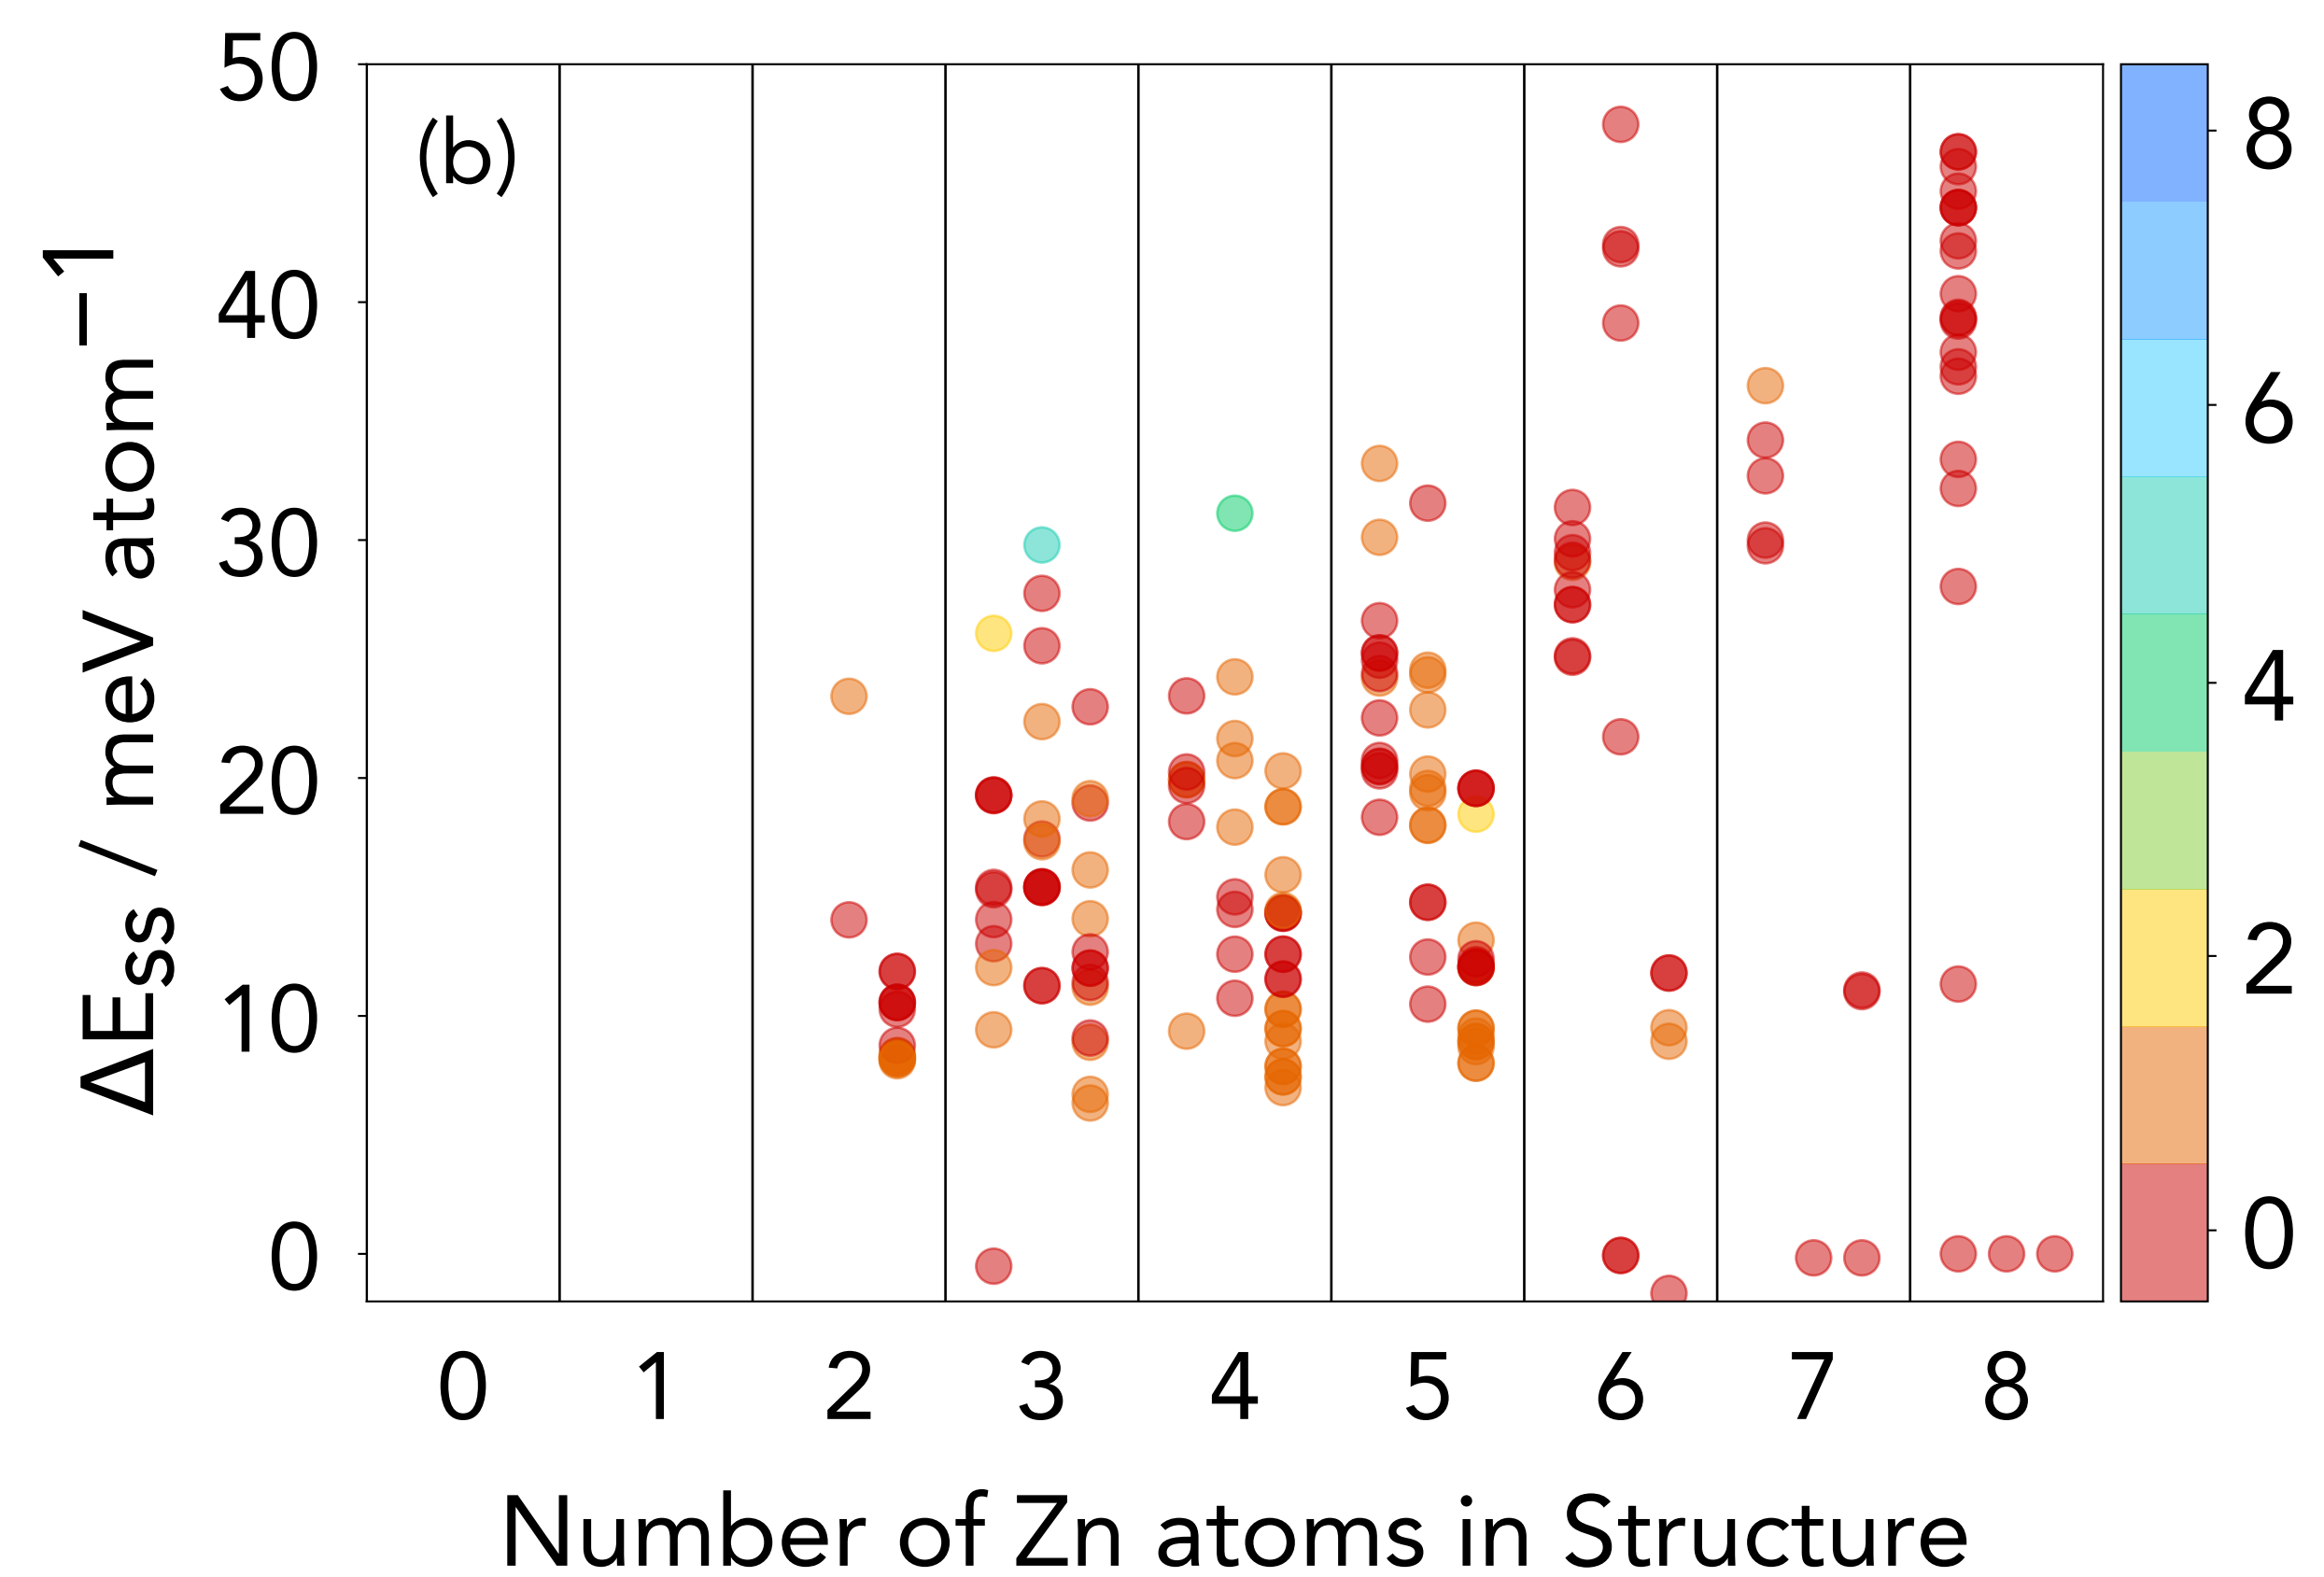

Supplement: d2cp02180c1.zip [file d2cp02180c1.zip]
